# Supplementary material for: Label-Free Proteomics Reveals Decreased Expression of CD18 and AKNA in Peripheral CD4+ T Cells from Patients with Vogt-Koyanagi-Harada Syndrome
Source: PubMed Central journal article supplement (PMC3030555; doi:10.1371/journal.pone.0014616), 2011-01-28
Supplement: pone.0014616.s002.pdf [file pone.0014616.s002.pdf]

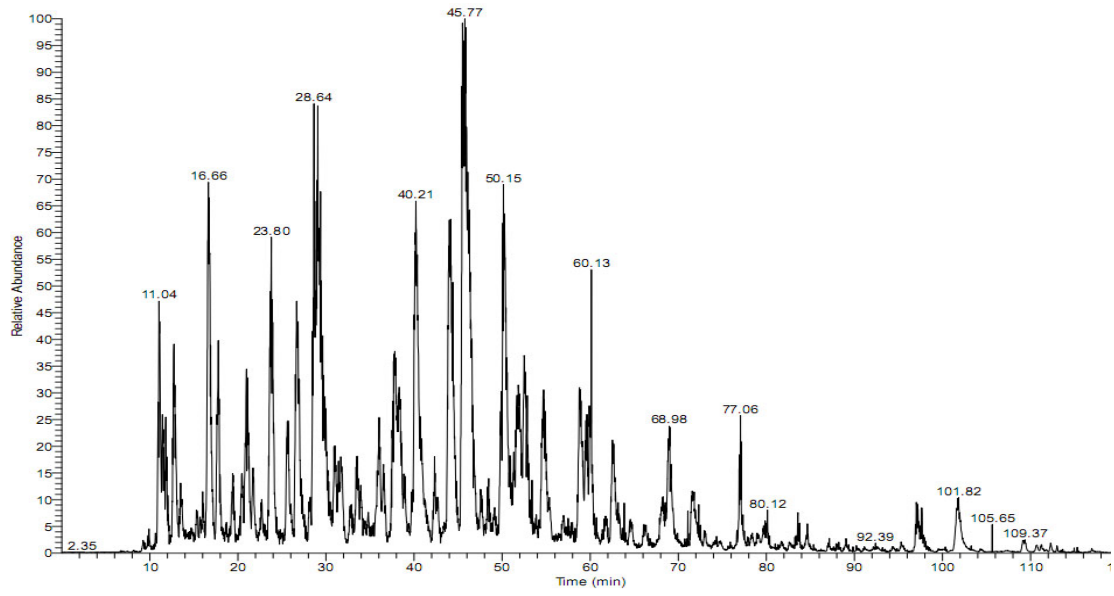

**Figure S2**

**A representative base peak ion chromatogram from LC-MS/MS analysis of a total membrane protein**

**extract from the VKH group digested with trypsin.**
