# Supplementary material for: Label-Free Proteomics Reveals Decreased Expression of CD18 and AKNA in Peripheral CD4+ T Cells from Patients with Vogt-Koyanagi-Harada Syndrome
Source: PubMed Central journal article supplement (PMC3030555; doi:10.1371/journal.pone.0014616), 2011-01-28
Supplement: pone.0014616.s003.pdf [file pone.0014616.s003.pdf]

**A8MYE6 Integrin beta**

MH+ (Da): 1047.7857

b ions

y ions

|    |           |               |    |           |              |
|----|-----------|---------------|----|-----------|--------------|
| b1 | T         | 102.1         |    |           |              |
| b2 | TT        | <b>203.2</b>  | y9 | TTEGCLNPR | 991.1        |
| b3 | TTE       | <b>332.3</b>  | y8 | TEGCLNPR  | 890          |
| b4 | TTEG      | <b>389.39</b> | y7 | EGCLNPR   | 788.9        |
| b5 | TTEGC     | 492.53        | y6 | GCLNPR    | <b>659.8</b> |
| b6 | TTEGCL    | <b>605.69</b> | y5 | CLNPR     | 602.7        |
| b7 | TTEGCLN   | <b>719.79</b> | y4 | LNPR      | <b>499.6</b> |
| b8 | TTEGCLNP  | 816.91        | y3 | NPR       | <b>386.4</b> |
| b9 | TTEGCLNPR | 973.1         | y2 | PR        | <b>272.3</b> |
|    |           |               | y1 | R         | 175.2        |

The detected ions were shown in bold.

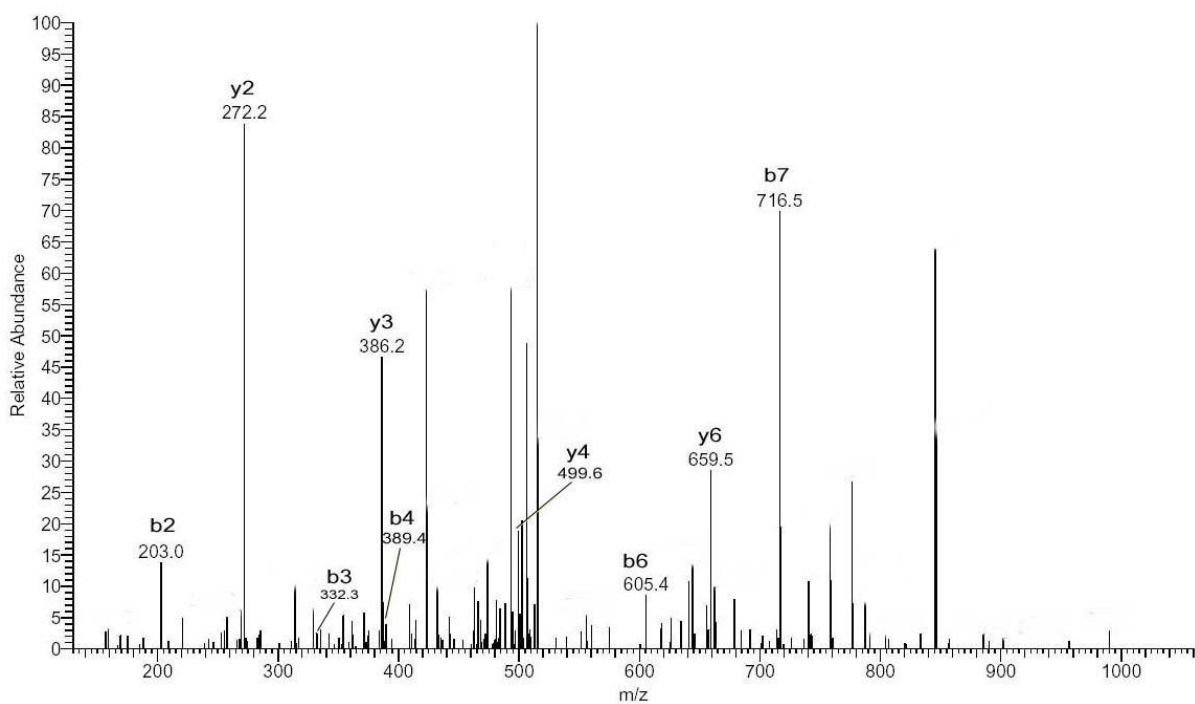

Q9P273 Teneurin-3

MH+  
(Da): 2254.3396

b ions

y ions

|     |                       |                |     |                       |                |
|-----|-----------------------|----------------|-----|-----------------------|----------------|
| b1  | Q                     | 129.15         |     |                       |                |
| b2  | QD                    | 244.23         | y21 | QDGMFDLVANGGASLTLVFER | 2257.52        |
| b3  | QDG                   | 301.29         | y20 | DGMFDLVANGGASLTLVFER  | 2129.39        |
| b4  | QDGM                  | 448.48         | y19 | GMFDLVANGGASLTLVFER   | 2014.3         |
| b5  | QDGMF                 | 595.66         | y18 | MFDLVANGGASLTLVFER    | 1957.24        |
| b6  | QDGMFD                | 710.74         | y17 | FDLVANGGASLTLVFER     | <b>1810.05</b> |
| b7  | QDGMFDL               | 823.9          | y16 | DLVANGGASLTLVFER      | <b>1662.88</b> |
| b8  | QDGMFDLV              | 923.04         | y15 | LVANGGASLTLVFER       | <b>1547.79</b> |
| b9  | QDGMFDLVA             | 994.12         | y14 | VANGGASLTLVFER        | 1434.63        |
| b10 | QDGMFDLVAN            | 1108.22        | y13 | ANGGASLTLVFER         | 1335.49        |
| b11 | QDGMFDLVANG           | 1165.27        | y12 | NGGASLTLVFER          | 1264.42        |
| b12 | QDGMFDLVANGG          | <b>1222.32</b> | y11 | GGASLTLVFER           | 1150.31        |
| b13 | QDGMFDLVANGGA         | 1293.4         | y10 | GASLTLVFER            | <b>1093.26</b> |
| b14 | QDGMFDLVANGGAS        | 1380.48        | y9  | ASLTLVFER             | 1036.21        |
| b15 | QDGMFDLVANGGASL       | 1493.64        | y8  | SLTLVFER              | <b>965.13</b>  |
| b16 | QDGMFDLVANGGASLT      | 1594.74        | y7  | LTLVFER               | <b>878.05</b>  |
| b17 | QDGMFDLVANGGASLTL     | 1707.9         | y6  | TLVFER                | <b>764.89</b>  |
| b18 | QDGMFDLVANGGASLTLV    | 1807.04        | y5  | LVFER                 | 663.79         |
| b19 | QDGMFDLVANGGASLTLVF   | 1954.21        | y4  | VFER                  | 550.63         |
| b20 | QDGMFDLVANGGASLTLVFE  | 2083.33        | y3  | FER                   | 451.49         |
| b21 | QDGMFDLVANGGASLTLVFER | 2239.52        | y2  | ER                    | 304.32         |
|     |                       |                | y1  | R                     | 175.2          |

The detected ions were shown in bold.

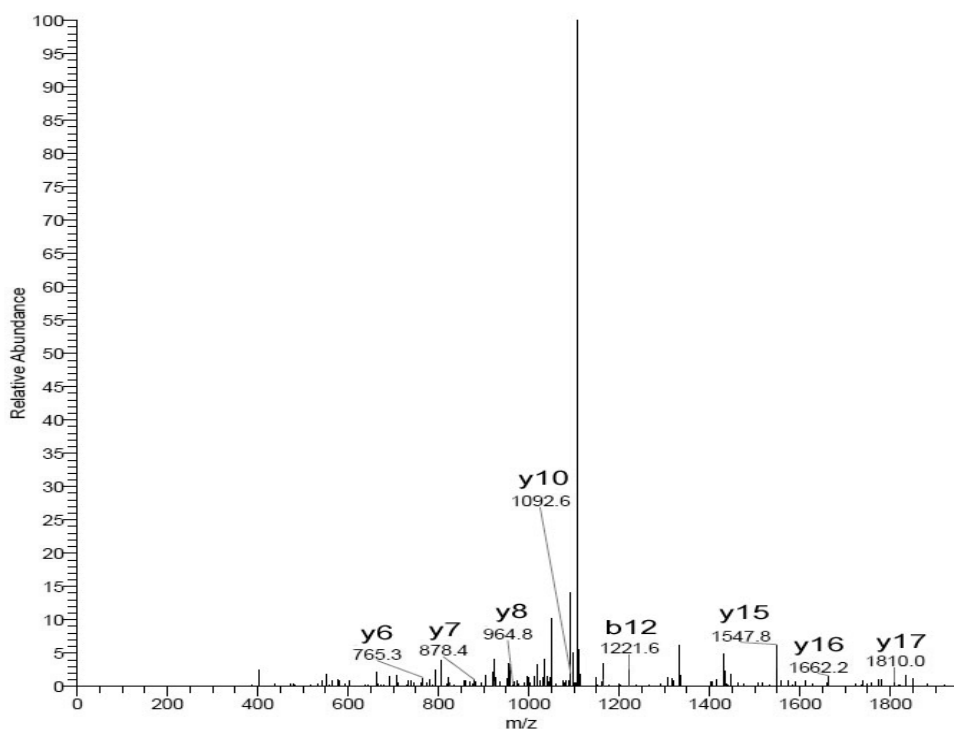

**Q92828**    **Coronin-2A**

MH+  
(Da):    1550.6224

b ions

y ions

|            |                      |                |            |                      |                |
|------------|----------------------|----------------|------------|----------------------|----------------|
| <b>b1</b>  | <b>K</b>             | <b>129.19</b>  | <b>y13</b> | <b>KLMSTGTSRWNNR</b> | <b>1551.76</b> |
| <b>b2</b>  | <b>KL</b>            | <b>242.35</b>  | <b>y12</b> | <b>LMSTGTSRWNNR</b>  | <b>1423.58</b> |
| <b>b3</b>  | <b>KLM</b>           | <b>373.54</b>  | <b>y11</b> | <b>MSTGTSRWNNR</b>   | <b>1310.42</b> |
| <b>b4</b>  | <b>KLMS</b>          | <b>460.62</b>  | <b>y10</b> | <b>STGTSRWNNR</b>    | <b>1179.23</b> |
| <b>b5</b>  | <b>KLMST</b>         | <b>561.72</b>  | <b>y9</b>  | <b>TGTSRWNNR</b>     | <b>1092.15</b> |
| <b>b6</b>  | <b>KLMSTG</b>        | <b>618.78</b>  | <b>y8</b>  | <b>GTSRWNNR</b>      | <b>991.05</b>  |
| <b>b7</b>  | <b>KLMSTGT</b>       | <b>719.88</b>  | <b>y7</b>  | <b>TSRWNNR</b>       | <b>933.99</b>  |
| <b>b8</b>  | <b>KLMSTGTS</b>      | <b>806.96</b>  | <b>y6</b>  | <b>SRWNNR</b>        | <b>832.89</b>  |
| <b>b9</b>  | <b>KLMSTGTSR</b>     | <b>963.15</b>  | <b>y5</b>  | <b>RWNNR</b>         | <b>745.81</b>  |
| <b>b10</b> | <b>KLMSTGTSRW</b>    | <b>1149.36</b> | <b>y4</b>  | <b>WNNR</b>          | <b>589.62</b>  |
| <b>b11</b> | <b>KLMSTGTSRWN</b>   | <b>1263.46</b> | <b>y3</b>  | <b>NNR</b>           | <b>403.41</b>  |
| <b>b12</b> | <b>KLMSTGTSRWNN</b>  | <b>1377.57</b> | <b>y2</b>  | <b>NR</b>            | <b>289.31</b>  |
| <b>b13</b> | <b>KLMSTGTSRWNNR</b> | <b>1533.76</b> | <b>y1</b>  | <b>R</b>             | <b>175.2</b>   |

The detected ions were shown in bold.

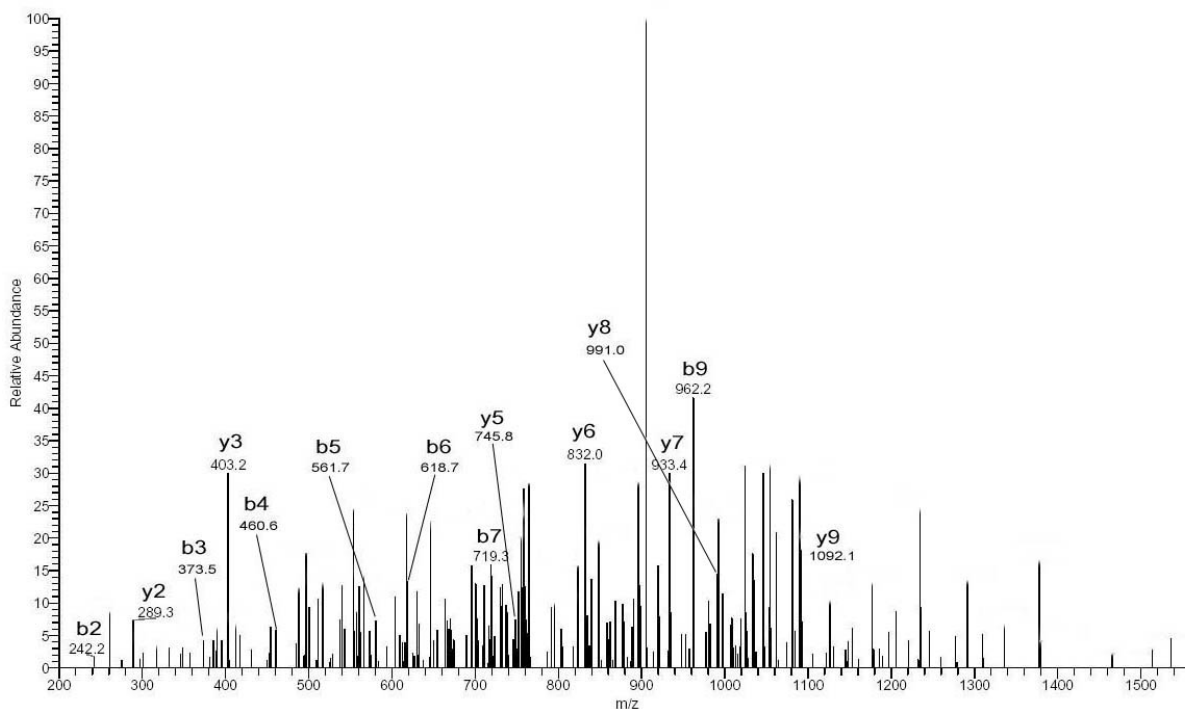

Q8TC23 C19orf2 protein MH+  
 (Da): 1088.1358  
 b ions y ions

|     |            |                |     |            |               |
|-----|------------|----------------|-----|------------|---------------|
| b1  | I          | 114.17         |     |            |               |
| b2  | IN         | 228.28         | y10 | INTGKNTTLK | 1090.26       |
| b3  | INT        | 329.38         | y9  | NTGKNTTLK  | 977.1         |
| b4  | INTG       | <b>386.44</b>  | y8  | TGKNTTLK   | 862.99        |
| b5  | INTGK      | <b>514.61</b>  | y7  | GKNTTLK    | 761.89        |
| b6  | INTGKN     | <b>628.71</b>  | y6  | KNTTLK     | <b>704.84</b> |
| b7  | INTGKNT    | <b>729.82</b>  | y5  | NTTLK      | <b>576.66</b> |
| b8  | INTGKNTT   | 830.92         | y4  | TTLK       | <b>462.56</b> |
| b9  | INTGKNTTL  | <b>944.08</b>  | y3  | TLK        | <b>361.45</b> |
| b10 | INTGKNTTLK | <b>1072.26</b> | y2  | LK         | 260.35        |
|     |            |                | y1  | K          | 147.19        |

The detected ions were shown in bold.

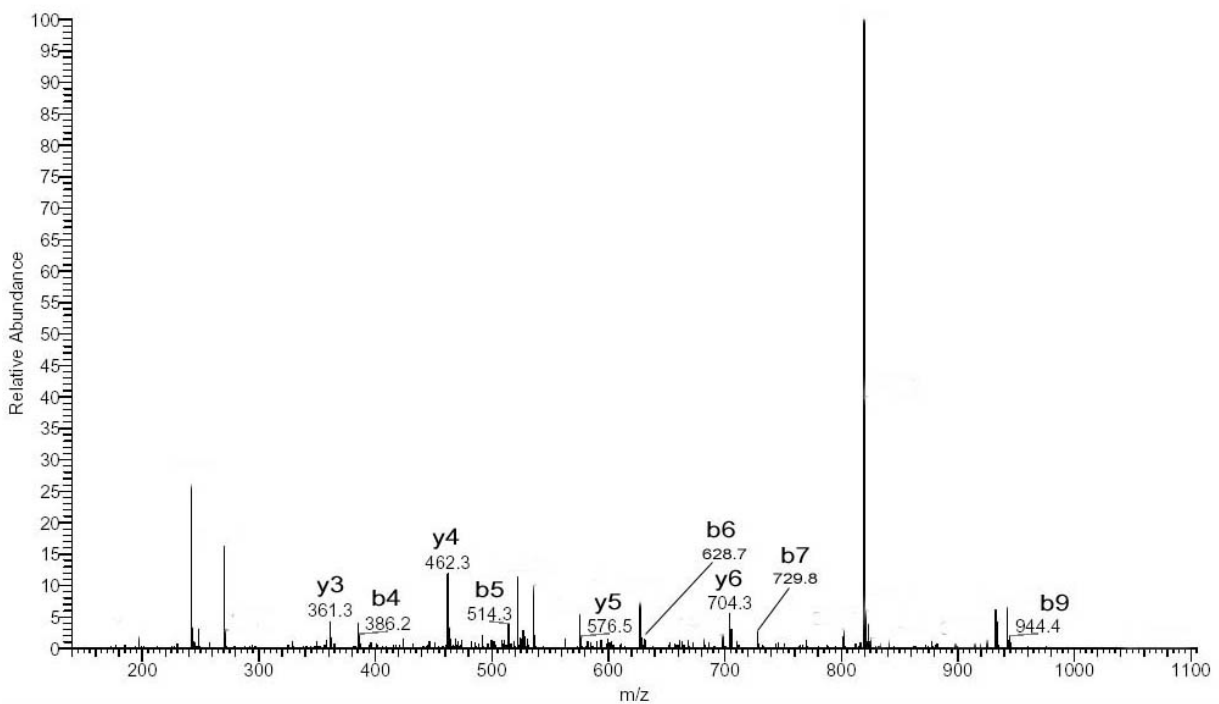

| P11532 Isoform 4 of Dystrophin |             | MH+ 1226.9591  |     |             |                |
|--------------------------------|-------------|----------------|-----|-------------|----------------|
| b ions                         |             | (Da): y ions   |     |             |                |
| b1                             | L           | 114.17         | y11 | LAVLKADLEKK | 1227.51        |
| b2                             | LA          | 185.25         | y10 | AVLKADLEKK  | <b>1114.35</b> |
| b3                             | LAV         | <b>284.39</b>  | y9  | VLKADLEKK   | 1043.27        |
| b4                             | LAVL        | <b>397.55</b>  | y8  | LKADLEKK    | <b>944.14</b>  |
| b5                             | LAVLK       | 525.72         | y7  | KADLEKK     | <b>830.98</b>  |
| b6                             | LAVLKA      | <b>596.8</b>   | y6  | ADLEKK      | 702.81         |
| b7                             | LAVLKAD     | <b>711.89</b>  | y5  | DLEKK       | 631.73         |
| b8                             | LAVLKADL    | 825.05         | y4  | LEKK        | 516.64         |
| b9                             | LAVLKADLE   | 954.16         | y3  | EKK         | 403.48         |
| b10                            | LAVLKADLEK  | <b>1082.34</b> | y2  | KK          | <b>274.36</b>  |
| b11                            | LAVLKADLEKK | 1210.51        | y1  | K           | 146.19         |

The detected ions were shown in bold.

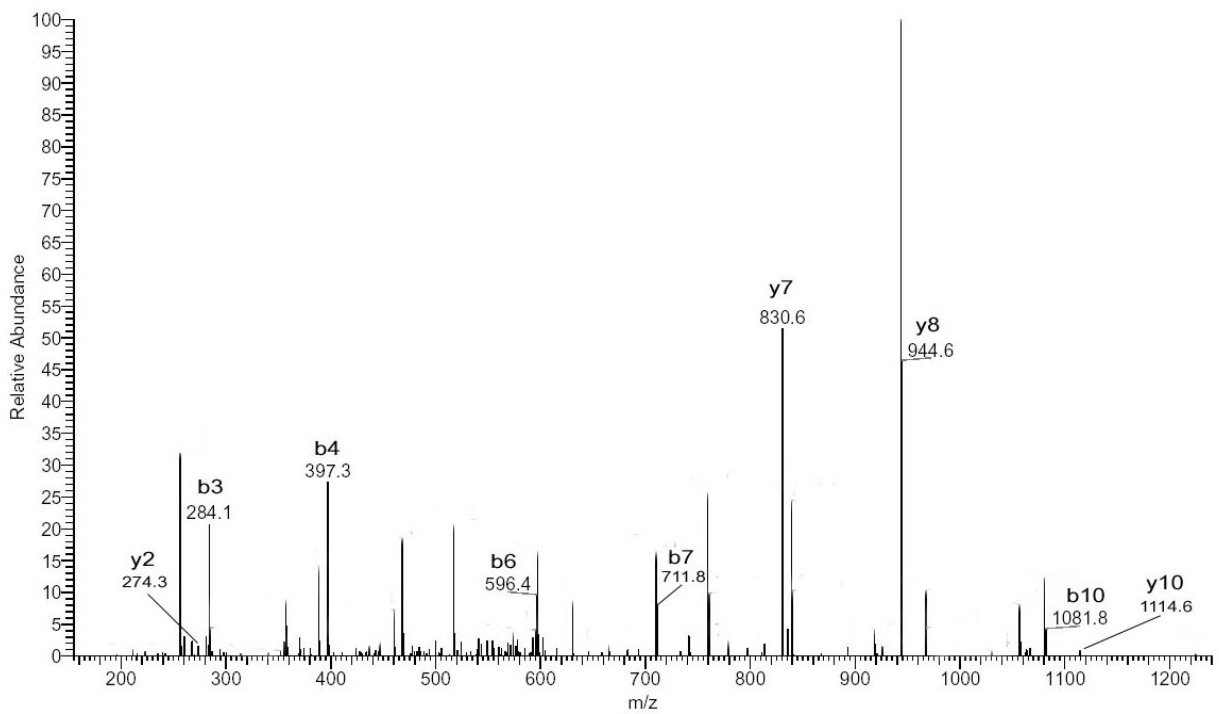



**Q562R1**      **hypothetical protein**      **MH+**  
**LOC345651**      **LOC345651**      **(Da):**      **1791.0197**  
b ions      y ions

|            |                  |                |     |                  |                |
|------------|------------------|----------------|-----|------------------|----------------|
| <b>b1</b>  | S                | 88.09          | y16 | SYELPDGQVITIGNER | 1791.95        |
| <b>b2</b>  | SY               | 251.27         | y15 | YELPDGQVITIGNER  | 1704.87        |
| <b>b3</b>  | SYE              | <b>380.38</b>  | y14 | ELPDGQVITIGNER   | 1541.69        |
| <b>b4</b>  | SYEL             | <b>493.54</b>  | y13 | LPDGQVITIGNER    | <b>1412.58</b> |
| <b>b5</b>  | SYELP            | <b>590.66</b>  | y12 | PDGQVITIGNER     | <b>1299.42</b> |
| <b>b6</b>  | SYELPD           | 705.75         | y11 | DGQVITIGNER      | 1202.3         |
| <b>b7</b>  | SYELPDG          | 762.8          | y10 | GQVITIGNER       | 1087.21        |
| <b>b8</b>  | SYELPDGQ         | 890.93         | y9  | QVITIGNER        | <b>1030.16</b> |
| <b>b9</b>  | SYELPDGQV        | <b>990.06</b>  | y8  | VITIGNER         | 902.03         |
| <b>b10</b> | SYELPDGQVI       | <b>1103.22</b> | y7  | ITIGNER          | <b>802.9</b>   |
| <b>b11</b> | SYELPDGQVIT      | <b>1204.33</b> | y6  | TIGNER           | <b>689.74</b>  |
| <b>b12</b> | SYELPDGQVITI     | <b>1317.49</b> | y5  | IGNER            | <b>588.63</b>  |
| <b>b13</b> | SYELPDGQVITIG    | <b>1374.54</b> | y4  | IGNER            | <b>475.47</b>  |
| <b>b14</b> | SYELPDGQVITIGN   | 1488.64        | y3  | NER              | <b>418.42</b>  |
| <b>b15</b> | SYELPDGQVITIGNE  | 1617.76        | y2  | ER               | 304.32         |
| <b>b16</b> | SYELPDGQVITIGNER | 1773.95        | y1  | R                | 175.2          |

The detected ions were shown in bold.

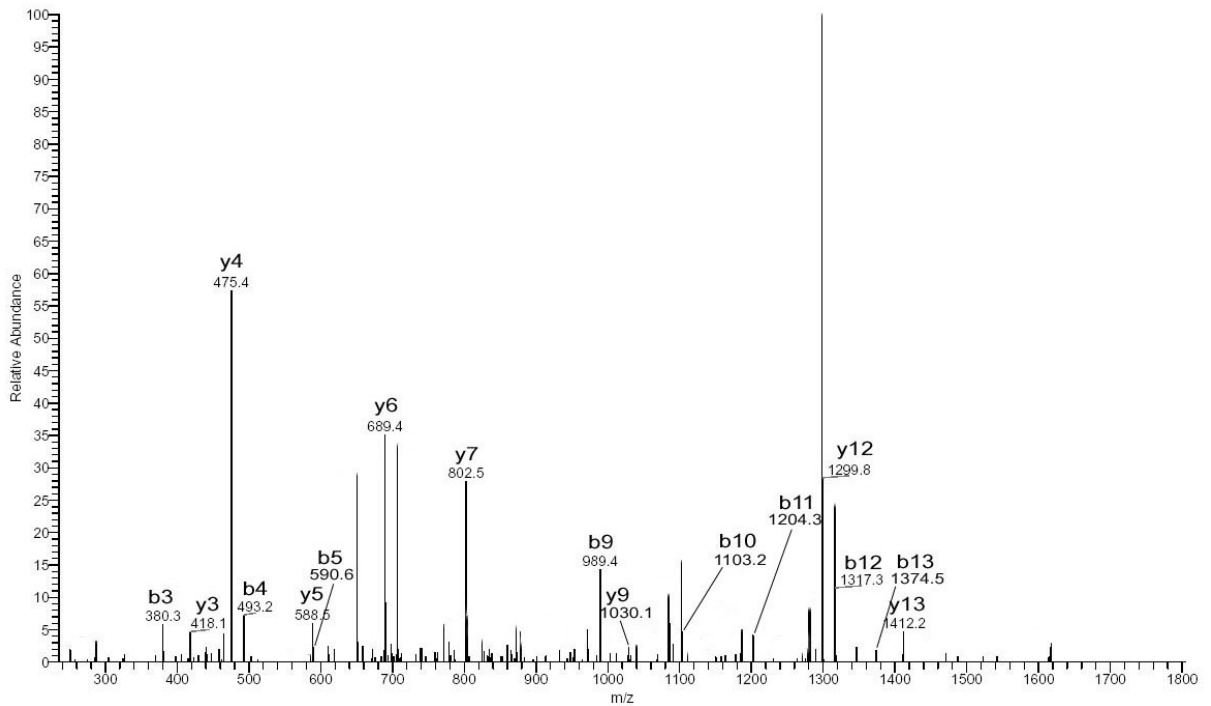

Q6ZWC4      none      MH+  
 (Da):      1546.8087  
 b ions      y ions

|     |               |                |     |               |                |
|-----|---------------|----------------|-----|---------------|----------------|
| b1  | A             | 72.09          | y14 | ALNLGAATVLRHR | 1548.83        |
| b2  | AL            | 185.25         | y13 | LNLGAATVLRHR  | 1477.75        |
| b3  | ALN           | 299.36         | y12 | NLGAATVLRHR   | <b>1364.59</b> |
| b4  | ALNL          | 412.52         | y11 | LGAATVLRHR    | <b>1250.48</b> |
| b5  | ALNLG         | 469.57         | y10 | GAATVLRHR     | 1137.33        |
| b6  | ALNLGA        | 540.65         | y9  | AATVLRHR      | <b>1080.27</b> |
| b7  | ALNLGAA       | <b>611.73</b>  | y8  | ATVLRHR       | 1009.19        |
| b8  | ALNLGAAT      | <b>712.83</b>  | y7  | TVLRHR        | <b>938.12</b>  |
| b9  | ALNLGAATV     | <b>811.96</b>  | y6  | VLRRHR        | <b>837.01</b>  |
| b10 | ALNLGAATVL    | 925.12         | y5  | LRRHR         | 737.88         |
| b11 | ALNLGAATVLR   | <b>1081.31</b> | y4  | RRHR          | <b>624.72</b>  |
| b12 | ALNLGAATVLRR  | 1237.5         | y3  | RHR           | 468.53         |
| b13 | ALNLGAATVLRHR | <b>1374.64</b> | y2  | HR            | 312.34         |
| b14 | ALNLGAATVLRHR | 1530.83        | y1  | R             | 175.2          |

The detected ions were shown in bold.

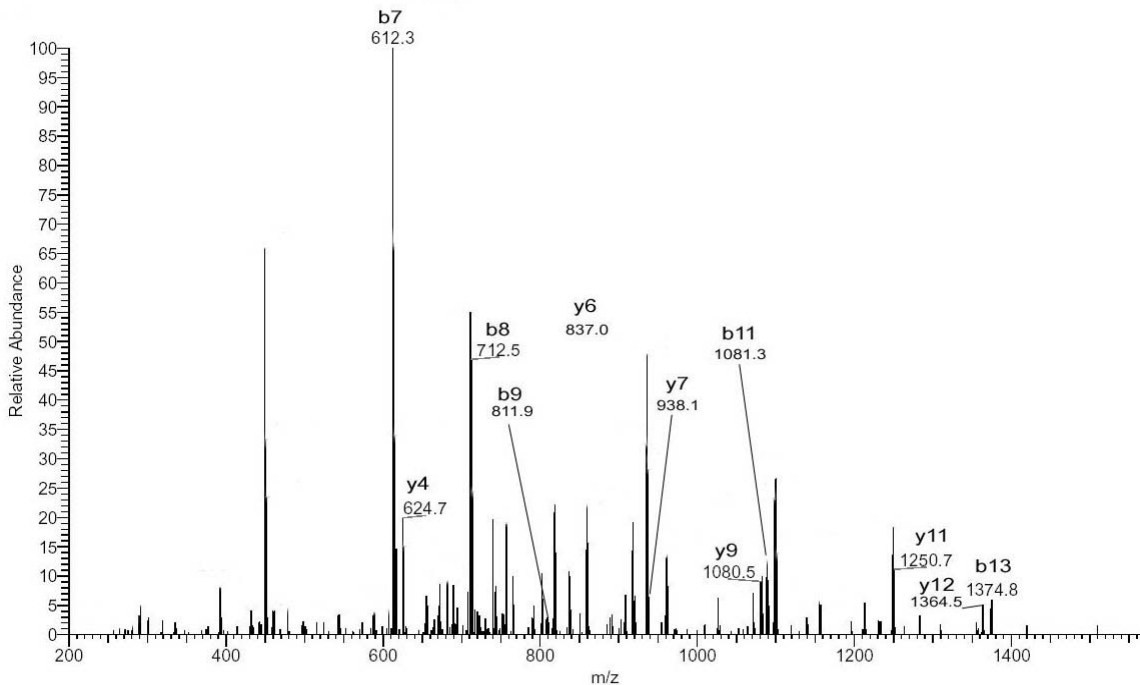



**Q9NSA0**  
**Isoform 1 of Solute carrier**  
**family 22 member 11**

MH+  
(Da): 2210.0904

| b ions     |                      |                 | y ions     |                      |                 |
|------------|----------------------|-----------------|------------|----------------------|-----------------|
| <b>b1</b>  | I                    | 114. 17         | <b>y20</b> | INGHKEAKNLTIEVLMSSVK | 2212. 6         |
| <b>b2</b>  | IN                   | 228. 28         | <b>y19</b> | NGHKEAKNLTIEVLMSSVK  | 2099. 45        |
| <b>b3</b>  | ING                  | 285. 33         | <b>y18</b> | GHKEAKNLTIEVLMSSVK   | 1985. 34        |
| <b>b4</b>  | INGH                 | 422. 47         | <b>y17</b> | HKEAKNLTIEVLMSSVK    | 1928. 29        |
| <b>b5</b>  | INGHK                | <b>550. 65</b>  | <b>y16</b> | KEAKNLTIEVLMSSVK     | <b>1791. 15</b> |
| <b>b6</b>  | INGHKE               | 679. 76         | <b>y15</b> | EAKNLTIEVLMSSVK      | <b>1662. 97</b> |
| <b>b7</b>  | INGHKEA              | 750. 84         | <b>y14</b> | AKNLTIEVLMSSVK       | 1533. 86        |
| <b>b8</b>  | INGHKEAK             | <b>879. 01</b>  | <b>y13</b> | KNLTIEVLMSSVK        | 1462. 78        |
| <b>b9</b>  | INGHKEAKN            | 993. 12         | <b>y12</b> | NLTIEVLMSSVK         | <b>1334. 61</b> |
| <b>b10</b> | INGHKEAKNL           | 1106. 28        | <b>y11</b> | LTIEVLMSSVK          | 1220. 5         |
| <b>b11</b> | INGHKEAKNLT          | 1207. 38        | <b>y10</b> | TIEVLMSSVK           | 1107. 34        |
| <b>b12</b> | INGHKEAKNLTIE        | 1320. 54        | <b>y9</b>  | IEVLMSSVK            | 1006. 24        |
| <b>b13</b> | INGHKEAKNLTIE        | 1449. 66        | <b>y8</b>  | EVLMSVK              | 893. 08         |
| <b>b14</b> | INGHKEAKNLTIEV       | <b>1548. 79</b> | <b>y7</b>  | VLMSVK               | 763. 96         |
| <b>b15</b> | INGHKEAKNLTIEVL      | <b>1661. 95</b> | <b>y6</b>  | LMSSVK               | <b>664. 83</b>  |
| <b>b16</b> | INGHKEAKNLTIEVLM     | <b>1793. 14</b> | <b>y5</b>  | MSSVK                | <b>551. 67</b>  |
| <b>b17</b> | INGHKEAKNLTIEVLMSS   | 1880. 22        | <b>y4</b>  | SSVK                 | 420. 48         |
| <b>b18</b> | INGHKEAKNLTIEVLMSS   | 1967. 3         | <b>y3</b>  | SVK                  | 333. 4          |
| <b>b19</b> | INGHKEAKNLTIEVLMSSV  | 2066. 43        | <b>y2</b>  | VK                   | 246. 32         |
| <b>b20</b> | INGHKEAKNLTIEVLMSSVK | 2194. 6         | <b>y1</b>  | K                    | 147. 19         |

The detected ions were shown in bold.

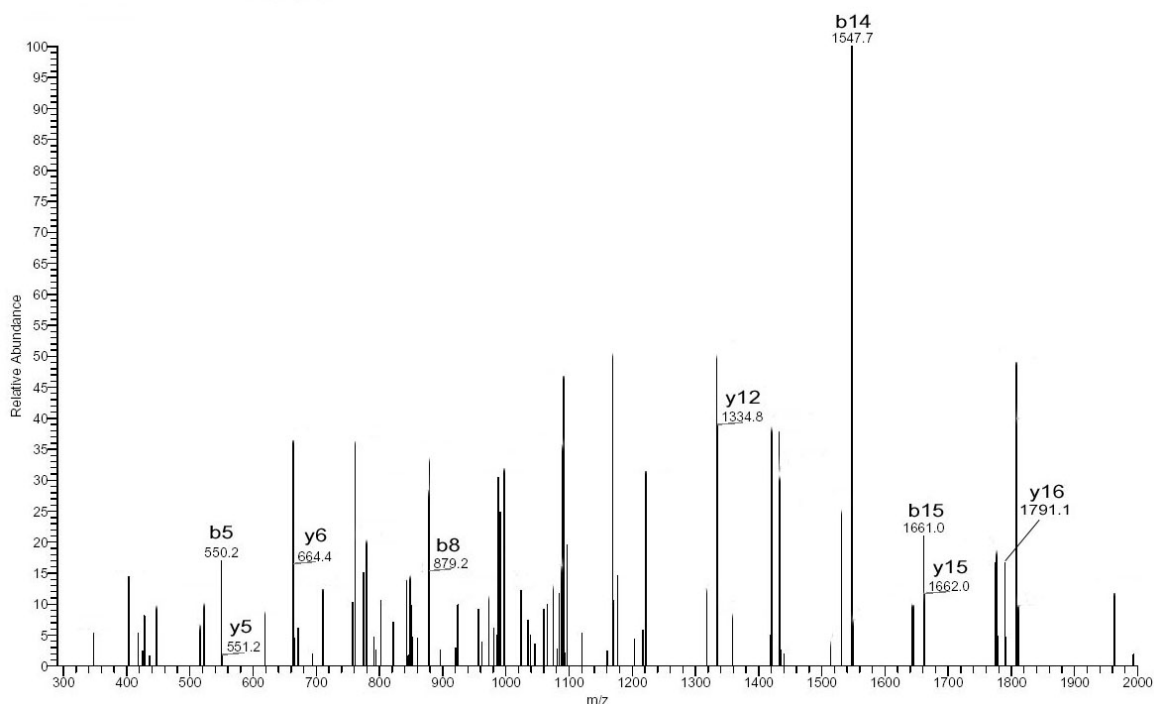

**UBC;UBB ubiquitin  
and ribosomal protein  
P62979 S27a precursor**

MH+  
(Da): 1788.1465

| b ions |                  |                | y ions |                  |                |
|--------|------------------|----------------|--------|------------------|----------------|
| b1     | T                | 102.12         | y16    | TITLEVEPSDTIENVK | 1788.98        |
| b2     | TI               | 215.28         | y15    | ITLEVEPSDTIENVK  | 1687.88        |
| b3     | TIT              | 316.38         | y14    | TLEVEPSDTIENVK   | 1574.72        |
| b4     | TITL             | <b>429.54</b>  | y13    | LEVEPSDTIENVK    | 1473.61        |
| b5     | TITLE            | 558.66         | y12    | EVEPSDTIENVK     | <b>1360.45</b> |
| b6     | TITLEV           | <b>657.79</b>  | y11    | VEPSDTIENVK      | <b>1231.34</b> |
| b7     | TITLEVE          | <b>786.91</b>  | y10    | EPSDTIENVK       | <b>1132.2</b>  |
| b8     | TITLEVEP         | <b>884.02</b>  | y9     | PSDTIENVK        | <b>1003.09</b> |
| b9     | TITLEVEPS        | 971.1          | y8     | SDTIENVK         | 905.97         |
| b10    | TITLEVEPSD       | 1086.19        | y7     | DTIENVK          | 818.89         |
| b11    | TITLEVEPSDT      | 1187.3         | y6     | TIENVK           | 703.81         |
| b12    | TITLEVEPSDTI     | 1300.46        | y5     | IENVK            | 602.7          |
| b13    | TITLEVEPSDTIE    | <b>1429.57</b> | y4     | ENVK             | <b>489.54</b>  |
| b14    | TITLEVEPSDTIEN   | <b>1543.68</b> | y3     | NVK              | <b>360.43</b>  |
| b15    | TITLEVEPSDTIENV  | <b>1642.81</b> | y2     | VK               | 246.32         |
| b16    | TITLEVEPSDTIENVK | 1770.98        | y1     | K                | 147.19         |

The detected ions were shown in bold.

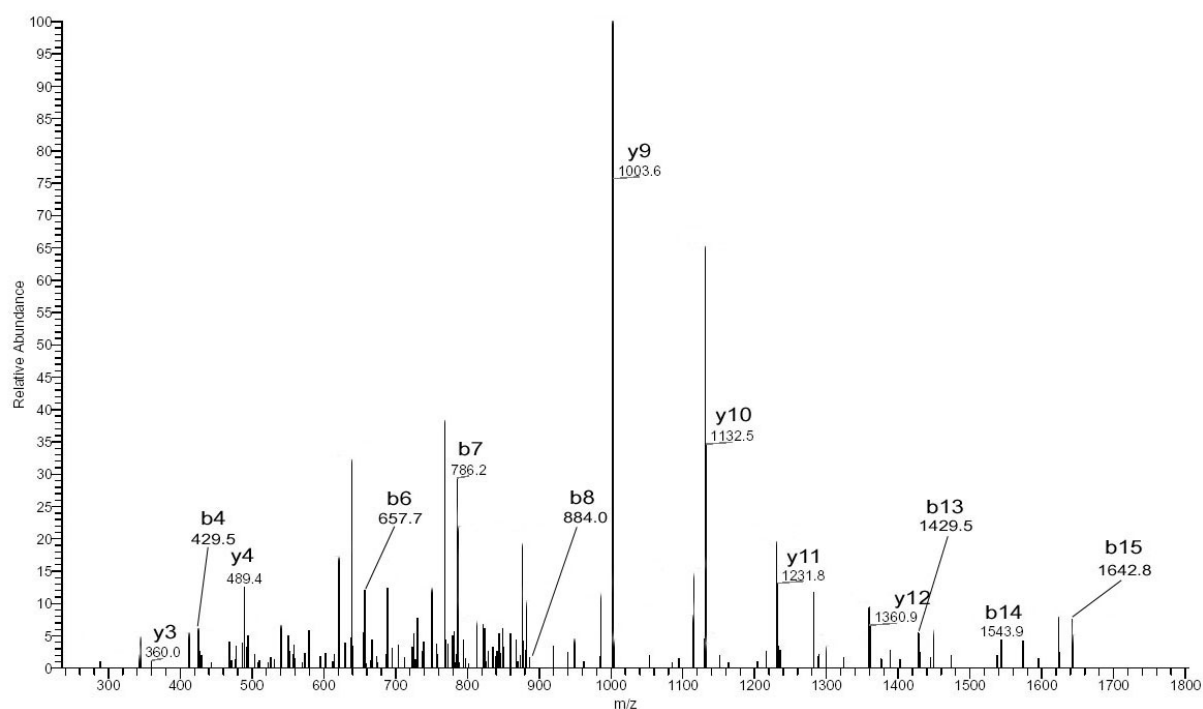



P60709      **Actin, cytoplasmic 1**      MH+  
 (Da):      1132.7391  
 b ions      y ions

|            |            |               |     |            |               |
|------------|------------|---------------|-----|------------|---------------|
| <b>b1</b>  | G          | <b>58.07</b>  |     |            |               |
| <b>b2</b>  | GY         | <b>221.24</b> | y10 | GYSFTTTAER | 1133.2        |
| <b>b3</b>  | GYS        | <b>308.32</b> | y9  | YSFTTTAER  | 1076.14       |
| <b>b4</b>  | GYSF       | <b>455.5</b>  | y8  | SFTTTAER   | <b>912.97</b> |
| <b>b5</b>  | GYSFT      | <b>556.6</b>  | y7  | FTTTAER    | <b>825.89</b> |
| <b>b6</b>  | GYSFTT     | <b>657.71</b> | y6  | TTTAER     | <b>678.71</b> |
| <b>b7</b>  | GYSFTTT    | <b>758.81</b> | y5  | TTAER      | <b>577.61</b> |
| <b>b8</b>  | GYSFTTTA   | <b>829.89</b> | y4  | TAER       | <b>476.5</b>  |
| <b>b9</b>  | GYSFTTTAE  | 959.01        | y3  | AER        | <b>375.4</b>  |
| <b>b10</b> | GYSFTTTAER | 1115.2        | y2  | ER         | <b>304.32</b> |
|            |            |               | y1  | R          | <b>175.2</b>  |

The detected ions were shown in bold.

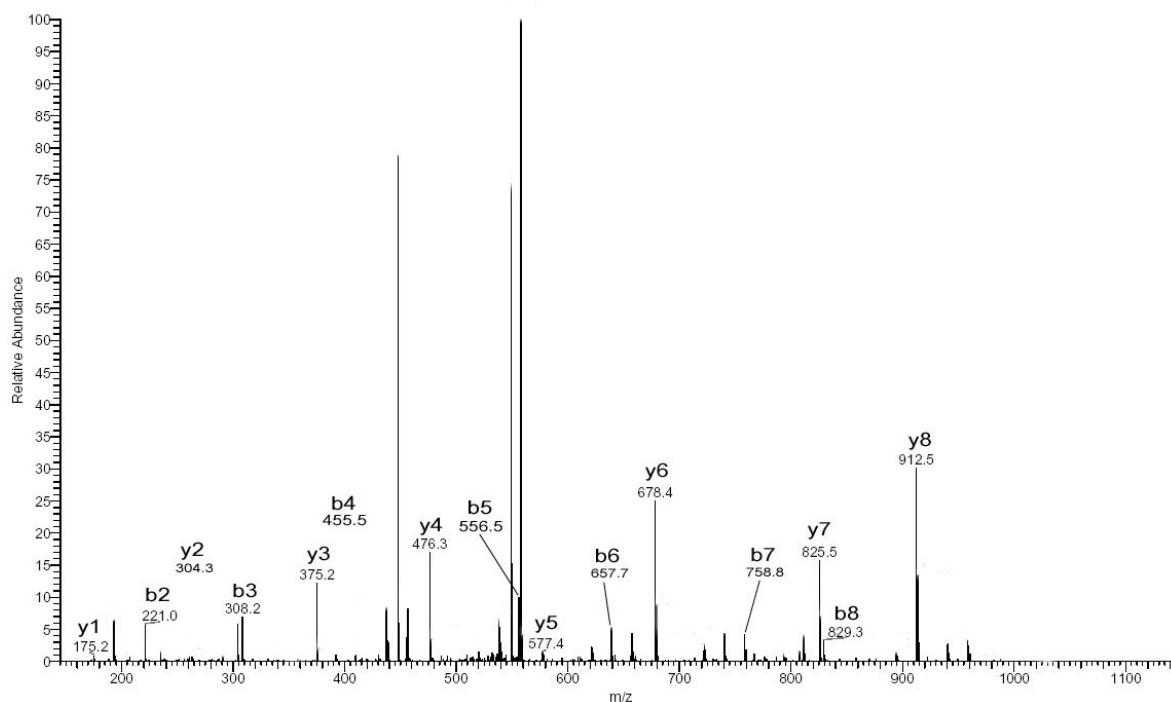

**Probable G-protein  
coupled receptor 179**  
A8MWI1 precursor

MH+  
(Da): 1150.9204

b ions

y ions

|            |              |               |            |              |                |
|------------|--------------|---------------|------------|--------------|----------------|
| <b>b1</b>  | G            | 58.07         | <b>y12</b> | GSSEAAGSVETR | 1151.17        |
| <b>b2</b>  | GS           | 145.15        | <b>y11</b> | SSEAAGSVETR  | 1094.12        |
| <b>b3</b>  | GSS          | 232.22        | <b>y10</b> | SEAAGSVETR   | <b>1007.04</b> |
| <b>b4</b>  | GSSE         | <b>361.34</b> | <b>y9</b>  | EAAGSVETR    | 919.96         |
| <b>b5</b>  | GSSEA        | <b>432.42</b> | <b>y8</b>  | AAGSVETR     | 790.84         |
| <b>b6</b>  | GSSEAA       | <b>503.5</b>  | <b>y7</b>  | AGSVETR      | <b>719.76</b>  |
| <b>b7</b>  | GSSEAAG      | <b>560.55</b> | <b>y6</b>  | GSVETR       | <b>648.69</b>  |
| <b>b8</b>  | GSSEAAGS     | <b>647.63</b> | <b>y5</b>  | SVETR        | 591.63         |
| <b>b9</b>  | GSSEAAGSV    | 746.76        | <b>y4</b>  | VETR         | <b>504.56</b>  |
| <b>b10</b> | GSSEAAGSVE   | <b>875.87</b> | <b>y3</b>  | ETR          | 405.42         |
| <b>b11</b> | GSSEAAGSVET  | 976.98        | <b>y2</b>  | TR           | <b>276.31</b>  |
| <b>b12</b> | GSSEAAGSVETR | 1133.17       | <b>y1</b>  | R            | 175.2          |

The detected ions were shown in bold.

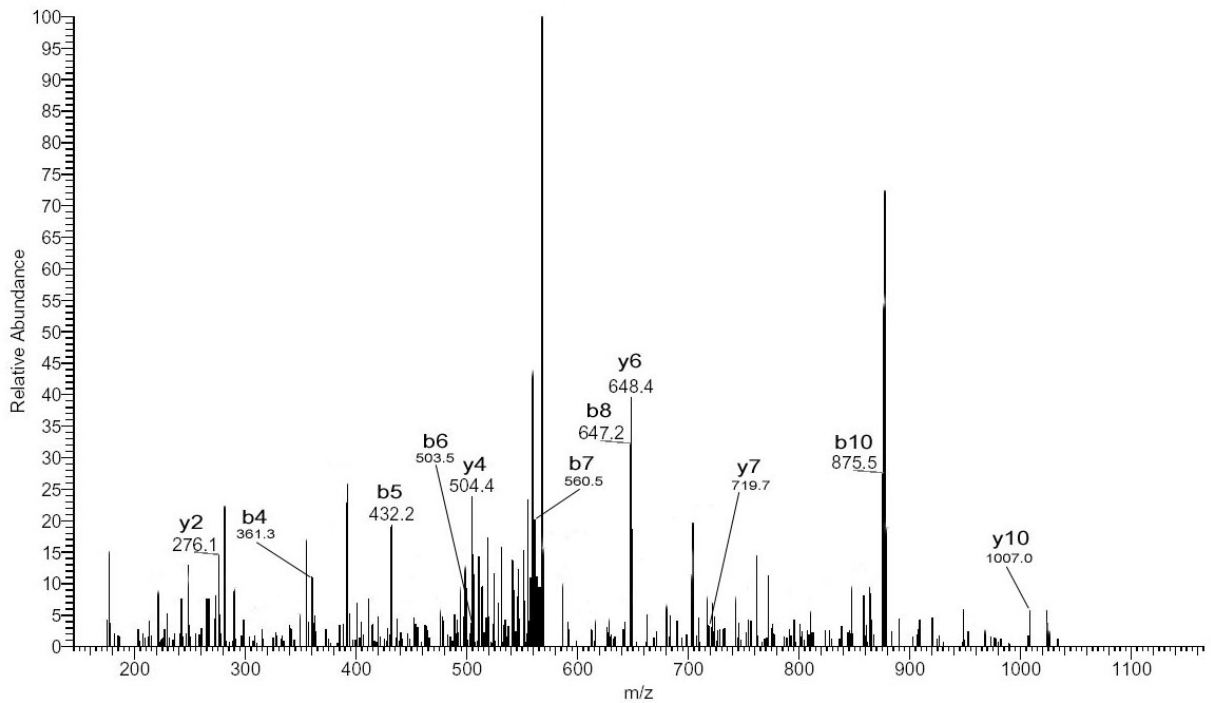

**heat shock 70kDa  
protein 9,  
mitochondrial  
precursor**

P38646  
b ions

MH+  
(Da): 1450.7788  
y ions

|     |                |         |     |                |               |
|-----|----------------|---------|-----|----------------|---------------|
| b1  | T              | 102.12  | y14 | TTPSVVAFTADGER | 1451.57       |
| b2  | TT             | 203.23  | y13 | TPSVVAFTADGER  | 1350.46       |
| b3  | TTP            | 300.34  | y12 | PSVVAFTADGER   | 1249.36       |
| b4  | TTPS           | 387.42  | y11 | SVVAFTADGER    | 1152.24       |
| b5  | TTPSV          | 486.55  | y10 | VVAFTADGER     | 1065.16       |
| b6  | TTPSVV         | 585.69  | y9  | VAFTADGER      | <b>966.03</b> |
| b7  | TTPSVVA        | 656.76  | y8  | AFTADGER       | <b>866.9</b>  |
| b8  | TTPSVVAF       | 803.94  | y7  | FTADGER        | <b>795.82</b> |
| b9  | TTPSVVAFT      | 905.05  | y6  | TADGER         | <b>648.64</b> |
| b10 | TTPSVVAFTA     | 976.12  | y5  | ADGER          | <b>547.54</b> |
| b11 | TTPSVVAFTAD    | 1091.21 | y4  | DGER           | <b>476.46</b> |
| b12 | TTPSVVAFTADG   | 1148.27 | y3  | GER            | <b>361.37</b> |
| b13 | TTPSVVAFTADGE  | 1277.38 | y2  | ER             | 304.32        |
| b14 | TTPSVVAFTADGER | 1433.57 | y1  | R              | 175.2         |

The detected ions were shown in bold.

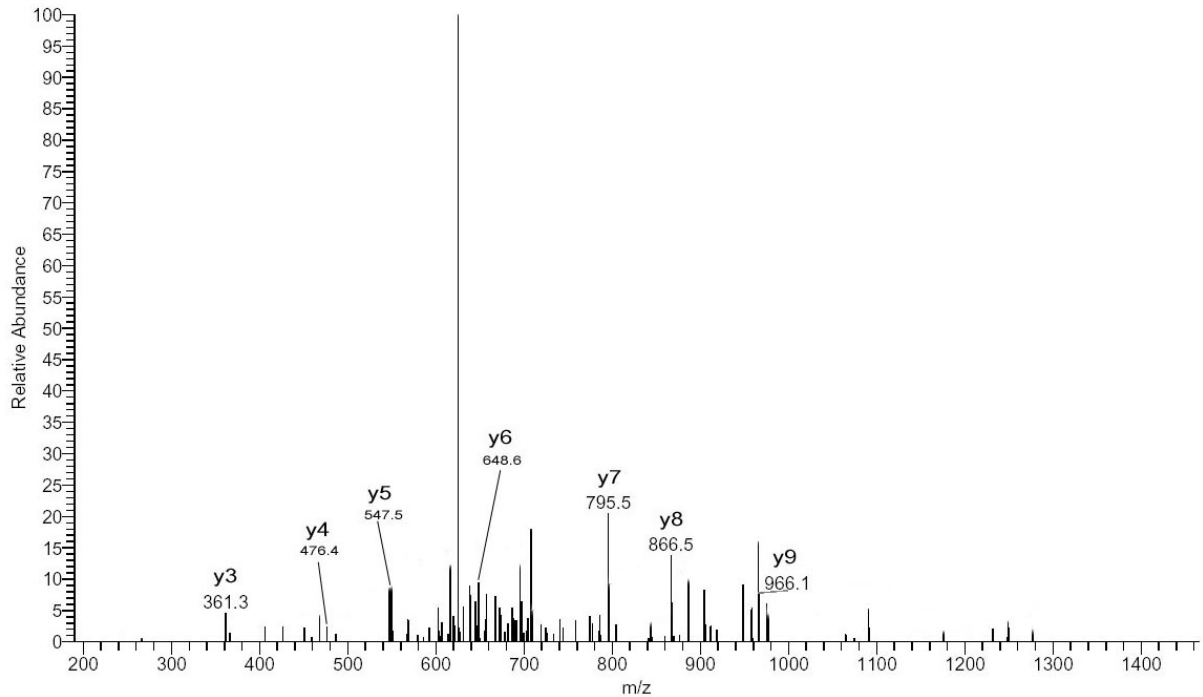

**Q9BSJ8**      **Isoform 1 of Protein**      MH+  
**FAM62A**      (Da):      1402.3521  
b ions      y ions

|     |              |                |     |              |                |
|-----|--------------|----------------|-----|--------------|----------------|
| b1  | Q            | 129.15         | y12 | QLLDDEEQLTAK | 1403.52        |
| b2  | QL           | 242.31         | y11 | LLDDEEQLTAK  | 1275.39        |
| b3  | QLL          | <b>355.46</b>  | y10 | LDDEEQLTAK   | <b>1162.23</b> |
| b4  | QLLD         | <b>470.55</b>  | y9  | DDEEQLTAK    | <b>1049.07</b> |
| b5  | QLLDD        | 585.64         | y8  | DEEQLTAK     | <b>933.98</b>  |
| b6  | QLLDDE       | 714.76         | y7  | EEQLTAK      | <b>818.89</b>  |
| b7  | QLLDDEE      | 843.87         | y6  | EQLTAK       | 689.78         |
| b8  | QLLDDEEQ     | 972            | y5  | QLTAK        | <b>560.66</b>  |
| b9  | QLLDDEEQL    | 1085.16        | y4  | LTAK         | <b>432.53</b>  |
| b10 | QLLDDEEQLT   | 1186.27        | y3  | TAK          | <b>319.37</b>  |
| b11 | QLLDDEEQLTA  | <b>1257.35</b> | y2  | AK           | 218.27         |
| b12 | QLLDDEEQLTAK | 1385.52        | y1  | K            | 147.19         |

The detected ions were shown in bold.

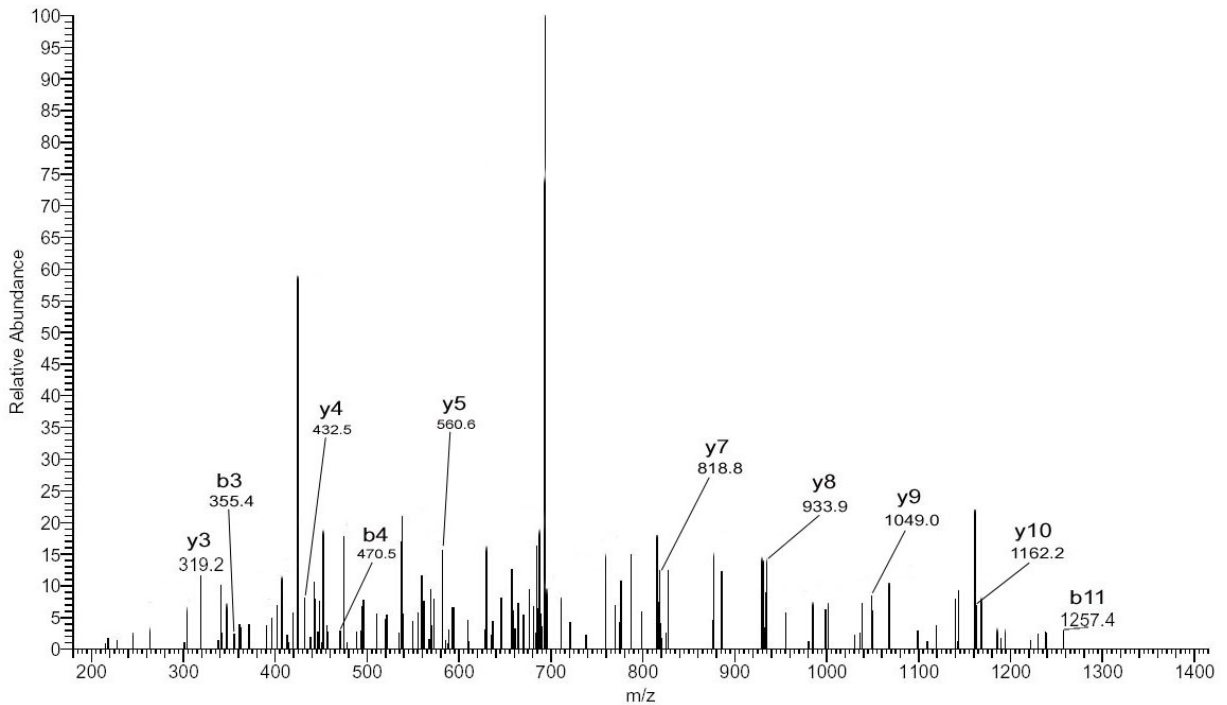

Q7Z5G9 ELMO2 protein MH+  
 (Da): 1484.9090  
 b ions y ions

|     |              |                 |     |              |                 |
|-----|--------------|-----------------|-----|--------------|-----------------|
| b1  | M            | 132. 21         | y12 | MERTQSSNMETR | 1470. 61        |
| b2  | ME           | 261. 32         | y11 | ERTQSSNMETR  | 1339. 41        |
| b3  | MER          | 417. 51         | y10 | RTQSSNMETR   | <b>1210. 3</b>  |
| b4  | MERT         | <b>518. 62</b>  | y9  | TQSSNMETR    | <b>1054. 11</b> |
| b5  | MERTQ        | 646. 75         | y8  | QSSNMETR     | 953. 01         |
| b6  | MERTQS       | <b>733. 82</b>  | y7  | SSNMETR      | 824. 88         |
| b7  | MERTQSS      | 820. 9          | y6  | SNMETR       | <b>737. 8</b>   |
| b8  | MERTQSSN     | <b>935. 01</b>  | y5  | NMETR        | <b>650. 72</b>  |
| b9  | MERTQSSNM    | <b>1066. 2</b>  | y4  | METR         | <b>536. 62</b>  |
| b10 | MERTQSSNME   | <b>1195. 31</b> | y3  | ETR          | <b>405. 42</b>  |
| b11 | MERTQSSNMET  | 1296. 42        | y2  | TR           | <b>276. 31</b>  |
| b12 | MERTQSSNMETR | 1452. 61        | y1  | R            | 175. 2          |

The detected ions were shown in bold.

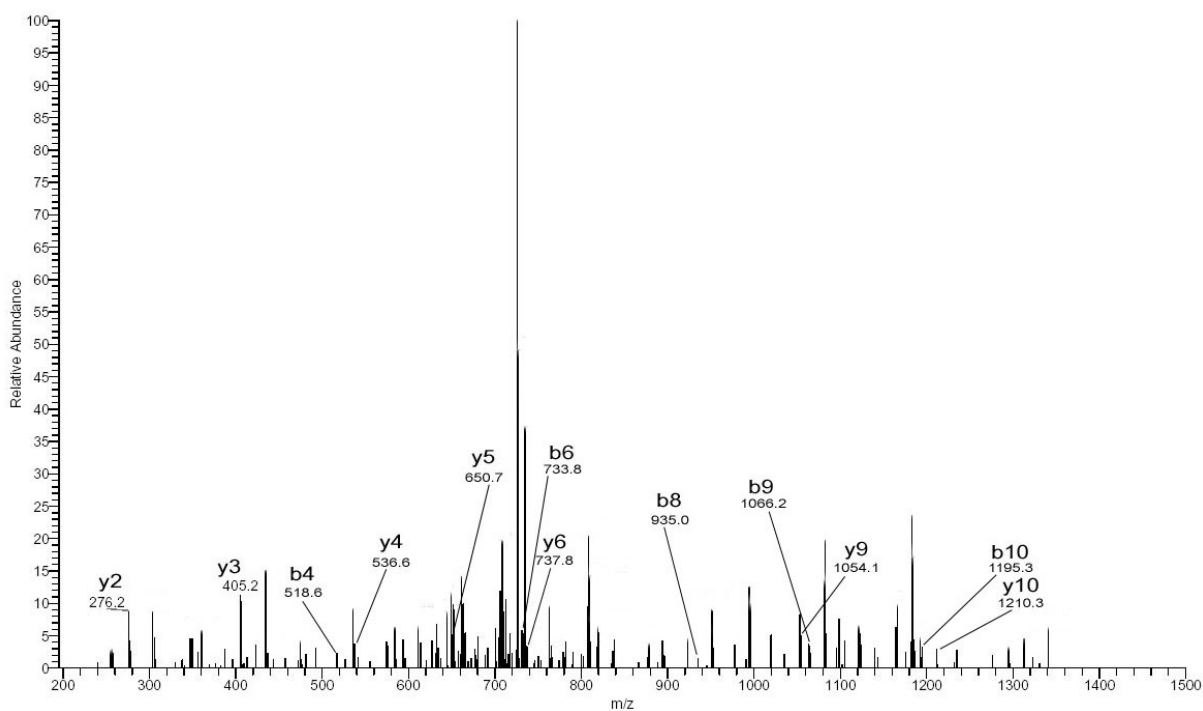





**P41219**      **Isoform 1 of**      MH+      1309.9330  
**Peripheralin**      (Da):  
b ions      y ions

|    |          |               |    |          |               |
|----|----------|---------------|----|----------|---------------|
| b1 | L        | 114.17        | y8 | LLEGEESR | 933           |
| b2 | LL       | <b>227.33</b> | y7 | LEGEESR  | <b>819.84</b> |
| b3 | LLE      | <b>356.45</b> | y6 | EGEESR   | <b>706.68</b> |
| b4 | LLEG     | 413.5         | y5 | GEESR    | <b>577.56</b> |
| b5 | LLEGE    | 542.62        | y4 | EESR     | <b>520.51</b> |
| b6 | LLEGEE   | <b>671.73</b> | y3 | ESR      | <b>391.4</b>  |
| b7 | LLEGEES  | 758.81        | y2 | SR       | <b>262.28</b> |
| b8 | LLEGEESR | 915           | y1 | R        | 175.2         |

The detected ions were shown in bold.

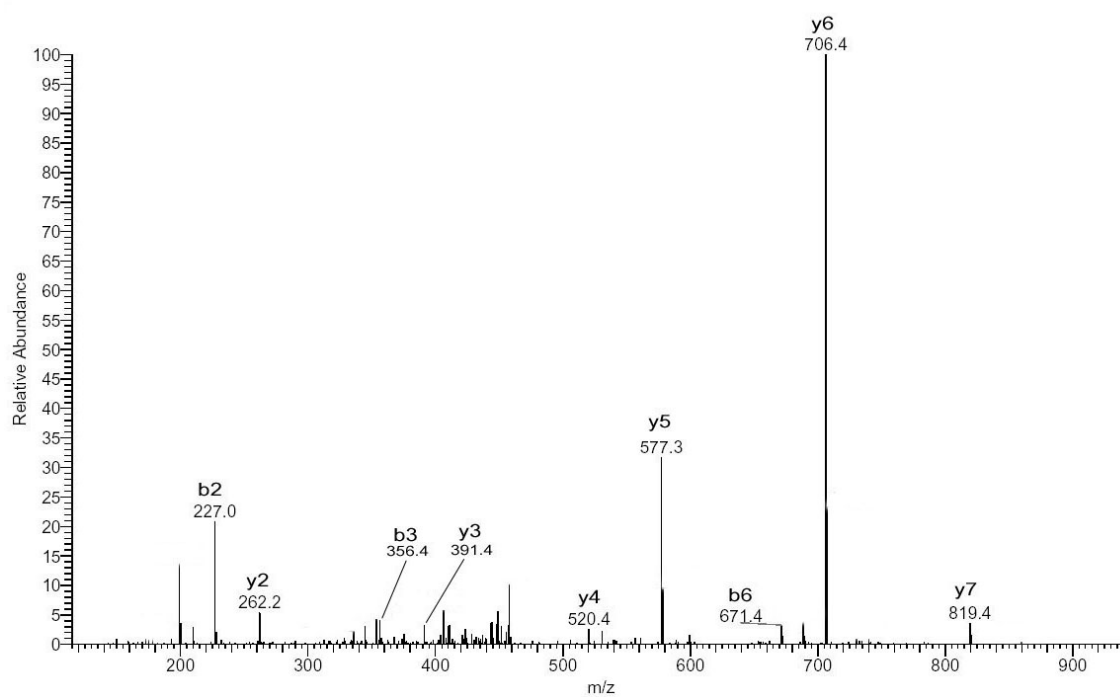

**ATP synthase subunit  
alpha, mitochondrial  
precursor**

MH+  
(Da): 1316.9060

P25705  
b ions

y ions

|     |              |                |     |              |                |
|-----|--------------|----------------|-----|--------------|----------------|
| b1  | T            | 102.12         | y12 | TSIAIDTIINQK | 1317.52        |
| b2  | TS           | 189.2          | y11 | SIAIDTIINQK  | 1216.41        |
| b3  | TSI          | 302.36         | y10 | IAIDTIINQK   | 1129.33        |
| b4  | TSIA         | <b>373.44</b>  | y9  | AIDTIINQK    | <b>1016.17</b> |
| b5  | TSIAI        | <b>486.6</b>   | y8  | IDTIINQK     | <b>945.1</b>   |
| b6  | TSIAID       | <b>601.68</b>  | y7  | DTIINQK      | <b>831.94</b>  |
| b7  | TSIAIDT      | 702.79         | y6  | TIINQK       | <b>716.85</b>  |
| b8  | TSIAIDTI     | <b>815.95</b>  | y5  | IINQK        | <b>615.74</b>  |
| b9  | TSIAIDTII    | <b>929.11</b>  | y4  | INQK         | <b>502.58</b>  |
| b10 | TSIAIDTIIN   | <b>1043.21</b> | y3  | NQK          | <b>389.42</b>  |
| b11 | TSIAIDTIINQ  | 1171.34        | y2  | QK           | <b>275.32</b>  |
| b12 | TSIAIDTIINQK | 1299.52        | y1  | K            | 147.19         |

The detected ions were shown in bold.

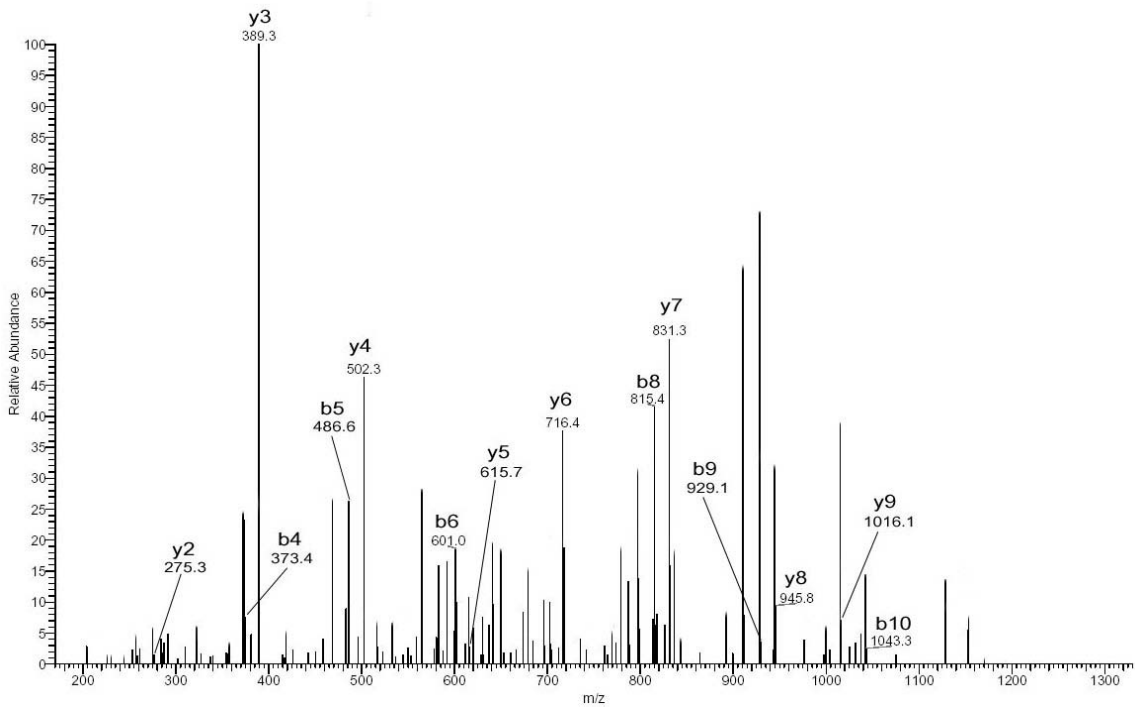

| B4DGP8     |               | Calnexin precursor |            | MH+           | (Da):          | 1488.7949 |
|------------|---------------|--------------------|------------|---------------|----------------|-----------|
| b ions     |               |                    | y ions     |               |                |           |
| <b>b1</b>  | I             | 114.17             | <b>y13</b> | IVDDWANDGWGLK | 1489.62        |           |
| <b>b2</b>  | IV            | 213.31             | <b>y12</b> | VDDWANDGWGLK  | 1376.46        |           |
| <b>b3</b>  | IVD           | <b>328.4</b>       | <b>y11</b> | DDWANDGWGLK   | <b>1277.33</b> |           |
| <b>b4</b>  | IVDD          | <b>443.48</b>      | <b>y10</b> | DWANDGWGLK    | 1162.24        |           |
| <b>b5</b>  | IVDDW         | <b>629.7</b>       | <b>y9</b>  | WANDGWGLK     | 1047.15        |           |
| <b>b6</b>  | IVDDWA        | <b>700.78</b>      | <b>y8</b>  | ANDGWGLK      | <b>860.94</b>  |           |
| <b>b7</b>  | IVDDWAN       | 814.88             | <b>y7</b>  | NDGWGLK       | <b>789.86</b>  |           |
| <b>b8</b>  | IVDDWAND      | <b>929.97</b>      | <b>y6</b>  | DGWGLK        | <b>675.75</b>  |           |
| <b>b9</b>  | IVDDWANDG     | 987.02             | <b>y5</b>  | GWGLK         | <b>560.67</b>  |           |
| <b>b10</b> | IVDDWANDGW    | 1173.23            | <b>y4</b>  | WGLK          | <b>503.61</b>  |           |
| <b>b11</b> | IVDDWANDGWG   | <b>1230.29</b>     | <b>y3</b>  | GLK           | 317.4          |           |
| <b>b12</b> | IVDDWANDGWGL  | 1343.45            | <b>y2</b>  | LK            | 260.35         |           |
| <b>b13</b> | IVDDWANDGWGLK | 1471.62            | <b>y1</b>  | K             | 147.19         |           |

The detected ions were shown in bold.

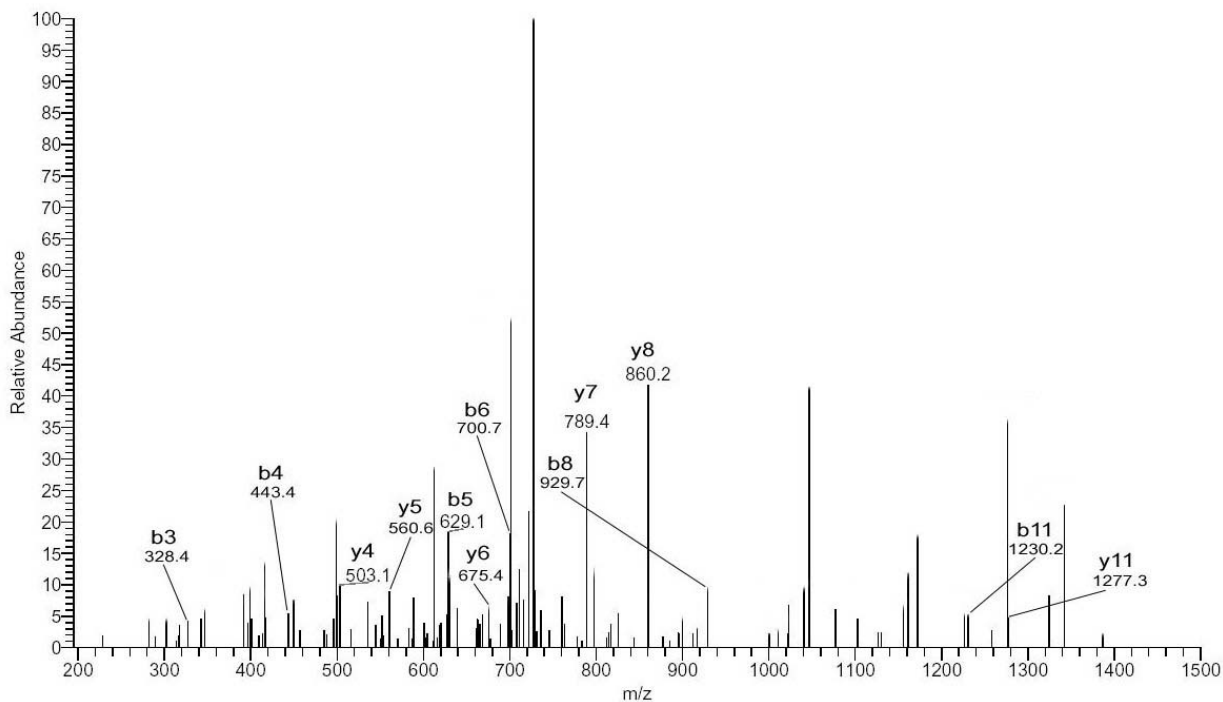

**Isoform 1 of**  
**AT-hook-containing**  
**Q7Z591 transcription factor**      MH+  
(Da):      1236.9160

| b ions     |              |                | y ions     |              |               |
|------------|--------------|----------------|------------|--------------|---------------|
| <b>b1</b>  | P            | <b>98.13</b>   | <b>y12</b> | PLPRQGATLAGR | 1237.44       |
| <b>b2</b>  | PL           | 211.29         | <b>y11</b> | LPRQGATLAGR  | 1140.32       |
| <b>b3</b>  | PLP          | 308.41         | <b>y10</b> | PRQGATLAGR   | 1027.16       |
| <b>b4</b>  | PLPR         | 464.6          | <b>y9</b>  | RQGATLAGR    | 930.05        |
| <b>b5</b>  | PLPRQ        | <b>592.73</b>  | <b>y8</b>  | QGATLAGR     | 773.86        |
| <b>b6</b>  | PLPRQG       | 649.78         | <b>y7</b>  | GATLAGR      | <b>645.73</b> |
| <b>b7</b>  | PLPRQGA      | <b>720.86</b>  | <b>y6</b>  | ATLAGR       | 588.68        |
| <b>b8</b>  | PLPRQGAT     | 821.96         | <b>y5</b>  | TLAGR        | <b>517.6</b>  |
| <b>b9</b>  | PLPRQGATL    | <b>935.12</b>  | <b>y4</b>  | LAGR         | 416.49        |
| <b>b10</b> | PLPRQGATLA   | <b>1006.2</b>  | <b>y3</b>  | AGR          | <b>303.33</b> |
| <b>b11</b> | PLPRQGATLAG  | <b>1063.25</b> | <b>y2</b>  | GR           | <b>232.25</b> |
| <b>b12</b> | PLPRQGATLAGR | 1219.44        | <b>y1</b>  | R            | 175.2         |

The detected ions were shown in bold.

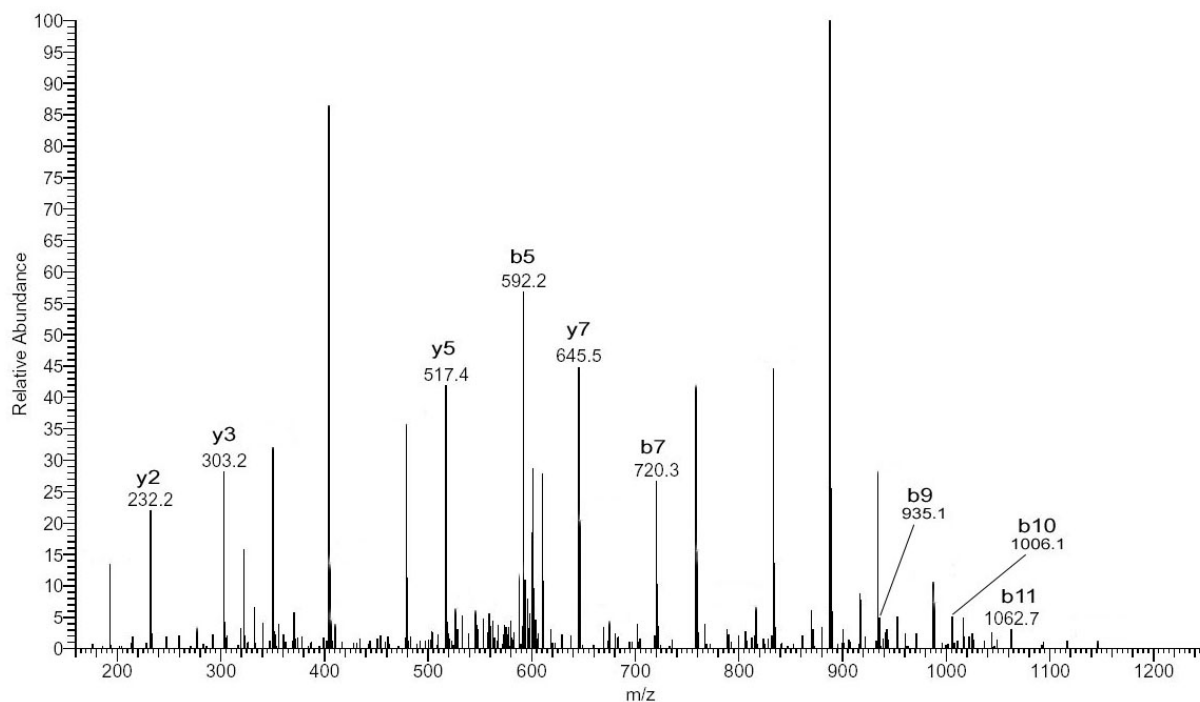

| <b>Integrin beta-2</b> |                  | MH+           |               |            |               |
|------------------------|------------------|---------------|---------------|------------|---------------|
| <b>P05107</b>          | <b>precursor</b> | (Da):         | 1090.0657     |            |               |
| <b>b ions</b>          |                  |               | <b>y ions</b> |            |               |
| <b>b1</b>              | A                | <b>72.09</b>  | y10           | ALNEITESGR | 1090.17       |
| <b>b2</b>              | AL               | <b>185.25</b> | y9            | LNEITESGR  | 1019.09       |
| <b>b3</b>              | ALN              | <b>299.36</b> | y8            | NEITESGR   | <b>905.93</b> |
| <b>b4</b>              | ALNE             | <b>428.47</b> | y7            | EITESGR    | <b>791.83</b> |
| <b>b5</b>              | ALNEI            | 541.63        | y6            | ITESGR     | <b>662.71</b> |
| <b>b6</b>              | ALNEIT           | <b>642.74</b> | y5            | TESGR      | 549.55        |
| <b>b7</b>              | ALNEITE          | 771.85        | y4            | ESGR       | <b>448.45</b> |
| <b>b8</b>              | ALNEITES         | <b>858.93</b> | y3            | SGR        | <b>319.33</b> |
| <b>b9</b>              | ALNEITESG        | 915.98        | y2            | GR         | <b>232.25</b> |
| <b>b10</b>             | ALNEITESGR       | 1072.17       | y1            | R          | 175.2         |

The detected ions were shown in bold.

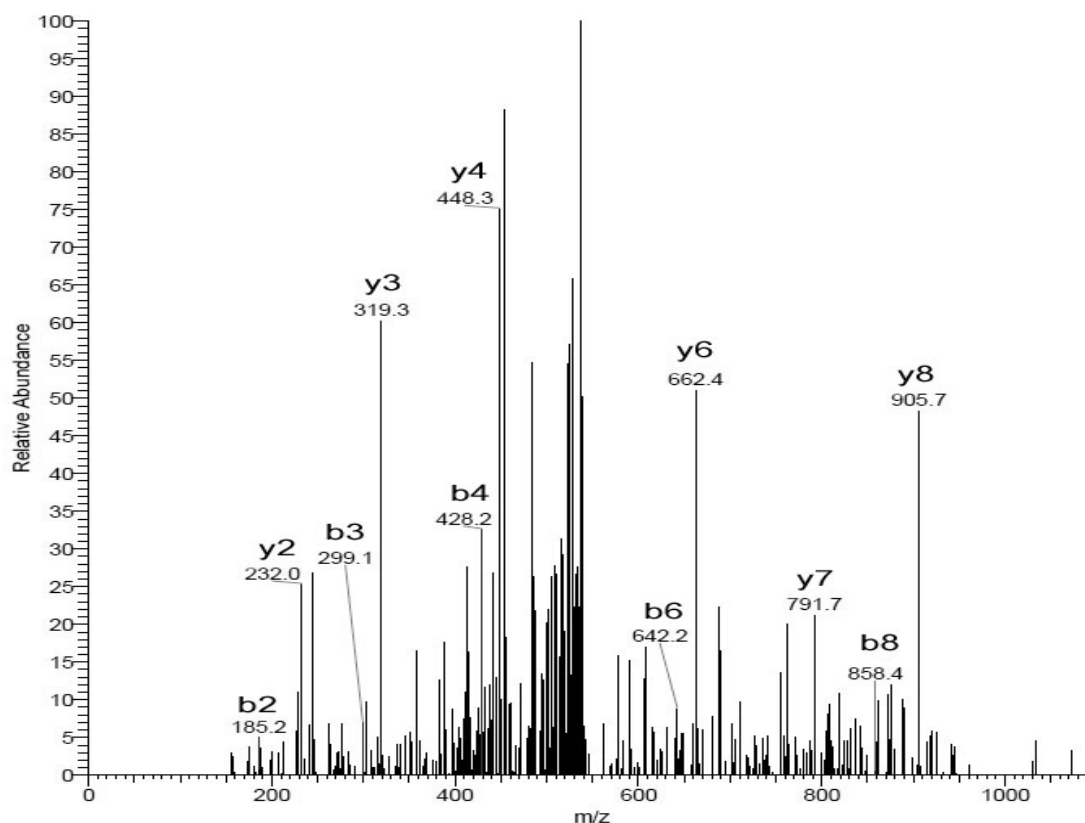

**Figure S3**

**The MS/MS spectra for single-peptide-based identifications.** The detected b and y ions used in the protein identification were labeled in the MS/MS spectra. The unlabeled peaks are a, c, x or z ions generated in mass spectrometer.
