# Supplementary material for: Label-Free Proteomics Reveals Decreased Expression of CD18 and AKNA in Peripheral CD4+ T Cells from Patients with Vogt-Koyanagi-Harada Syndrome
Source: PLoS One. 2011 Jan 28;6(1):e14616. doi: 10.1371/journal.pone.0014616 (PMC3030555; doi:10.1371/journal.pone.0014616)
Supplement: Table S1 — All the identified peptides and their sequences of each protein in both samples. (0.08 MB XLS) [file pone.0014616.s004.xls]

## Sheet: Sheet1
	Table S1 All the identified peptides and their sequences of each protein in both samples.
	Match #	Profiles	Mass (Da)	Time (min)	Time stdev (min)	Av. Diff. (2Log)	Av. Ratio (Lin)	t-test p	proteinID	ID detail	Peptide	ID Score (Xcorr)	MH+ (Da)	Mass stdev (Da)	P08097_NC Int (NC)	P08097_NC Time (NC)	P08097_NC Mass (NC)	P08097_NC_081207024349 Int (NC)	P08097_NC_081207024349 Time (NC)	P08097_NC_081207024349 Mass (NC)	P08097_NC_081207061700 Int (NC)	P08097_NC_081207061700 Time (NC)	P08097_NC_081207061700 Mass (NC)	P08097_VKH Int (VKH)	P08097_VKH Time (VKH)	P08097_VKH Mass (VKH)	P08097_VKH_081206145737 Int (VKH)	P08097_VKH_081206145737 Time (VKH)	P08097_VKH_081206145737 Mass (VKH)	P08097_VKH_081206183048 Int (VKH)	P08097_VKH_081206183048 Time (VKH)	P08097_VKH_081206183048 Mass (VKH)
	2	9	1544.89	38.6924	0.17351	-0.324352	0.800396	0.011031	IPI00003503.4	Gene_Symbol=ZNF235 Isoform 2 of Zinc finger protein 235	K.LWM*KELQTQRGK.H	2.2947	1545.9	0.00223665	17.9622	38.7587	1544.89	18.0542	38.6428	1544.89	18.2019	38.5422	1544.89	18.3671	39.1167	1544.89	18.4334	38.5925	1544.89	18.3908	38.7133	1544.89
	168	9	1087.71	24.7466	0.196082	0.174398	1.12681	0.0391072	IPI00289861.4	Gene_Symbol=ZCCHC11 Isoform 1 of Zinc finger CCHC domain-containing protein 11	R.M*DDFQLKGIVEEKFVK.W	3.3514	1088.72	0.170571	12.1605	24.899	1087.88	12.158	24.8249	1087.89	12.1305	24.894	1087.62	12.0509	25.0437	1087.52	12.0112	24.374	1087.71	11.8638	24.621	1087.43
	840	9	1493.01	18.1454	0.256553	1.56762	2.98814	0.000315428	IPI00418471.6	Gene_Symbol=VIM Vimentin	R.QVDQLTNDK.A	3.3562	1494.02	0.190814	12.3744	18.1524	1492.97	12.1235	18.0404	1493.08	11.917	18.2191	1493.43	10.6256	18.699	1492.71	10.5366	17.7184	1492.98	10.5499	18.1788	1493.01
	795	8	2082	49.0378	0.204724	1.27003	2.41106	1.95198e-05	IPI00418471.6	Gene_Symbol=VIM Vimentin	K.ILLAELEQLK.G	5.5269	2083.01	0.17698	13.2392	48.9324	2082.07	13.124	48.9773	2082.26	13.1522	48.9722	2082.07	11.874	49.4901	2081.98	11.9834	49.0744	2081.99	11.8478	49.1277	2081.62
	667	9	1030.53	38.312	0.359768	1.37245	2.58772	0.00031202	IPI00418471.6	Gene_Symbol=VIM Vimentin	R.SLYASSPGGVYATR.S	3.165	1031.54	0.572496	13.129	38.344	1029.26	13.1237	38.3945	1030.89	13.3666	38.3204	1030.89	11.7542	38.9778	1030.98	12.007	38.4503	1030.71	11.7407	38.3722	1030.98
	525	9	1261.85	20.3619	0.229602	1.71428	3.28351	0.000453127	IPI00418471.6	Gene_Symbol=VIM Vimentin	K.VELQELNDR.F	3.9927	1262.86	0.142804	13.6704	20.4674	1261.8	13.3582	20.369	1262.07	13.2902	20.2376	1262.07	11.7172	20.8946	1261.8	11.9237	20.3003	1261.8	11.5352	20.3669	1261.62
	28	9	944.811	42.2528	0.118973	1.03631	2.05018	3.56946e-05	IPI00418471.6	Gene_Symbol=VIM Vimentin	R.EEAENTLQSFR.Q	2.4172	945.819	0.152452	13.0812	42.2455	944.982	12.9763	42.2	944.713	13.0206	42.1316	944.982	11.9378	42.5421	944.713	12.0716	42.307	944.8	11.9598	42.2469	944.8
	141	9	1197.72	12.668	0.233091	0.360836	1.28636	0.00517286	IPI00418471.6	Gene_Symbol=VIM Vimentin	K.VESLQEEIAFLK.K	3.6068	1198.73	0.0867599	14.2246	12.7627	1197.8	14.4402	12.4893	1197.7	14.3235	12.5036	1197.8	13.9668	13.2279	1197.62	13.9371	12.4796	1197.7	14.0019	12.6349	1197.8
	518	9	1645.19	48.819	0.132702	0.274932	1.20963	0.0124163	IPI00418471.6	Gene_Symbol=VIM Vimentin	R.KVESLQEEIAFLK.K	4.6919	1646.2	0.353389	11.9601	48.7141	1644.89	11.988	48.7817	1644.89	11.8508	48.7892	1644.89	11.6944	49.1002	1645.19	11.7166	48.7124	1645.71	11.5632	48.961	1645.19
	765	9	1311.89	53.6565	0.233564	1.84543	3.61022	0.000299509	IPI00418471.6	Gene_Symbol=VIM Vimentin	R.QDVDNASLAR.L	3.3012	1312.9	0.358138	12.8849	53.5928	1311.8	13.0936	53.5967	1311.62	13.3379	53.6641	1311.7	11.4217	54.0599	1311.89	11.2331	53.4985	1312.8	11.1252	54.0258	1311.89
	160	9	1225.95	58.6548	0.082035	1.32902	2.49484	0.000609748	IPI00418471.6	Gene_Symbol=VIM Vimentin	K.FADLSEAANR.N	2.2679	1226.96	0.203695	13.2908	58.5586	1225.98	13.1956	58.5741	1225.52	13.3555	58.6196	1225.98	11.8485	58.8105	1226.25	11.8011	58.7116	1226.07	12.2052	58.7255	1225.8
	153	9	1787.14	46.0364	0.151193	-0.448633	0.728848	0.0284669	IPI00024145.1	Gene_Symbol=VDAC2 Voltage-dependent anion-selective channel protein 2	K.LTFDTTFSPNTGK.K	3.2895	1788.15	0.156374	12.5176	45.9655	1786.97	12.3281	45.9726	1786.98	12.3732	45.7816	1787.24	13.0369	46.3356	1786.97	12.902	46.124	1787.35	12.6259	46.0507	1787.07
	91	9	1371.65	45.6819	0.164229	0.383169	1.30331	0.00260242	IPI00220416.3	Gene_Symbol=UQCRB Cytochrome b-c1 complex subunit 7	K.YEEENFYLEPYLK.E	4.334	1372.66	0.483089	12.7431	45.6135	1371.8	12.7169	45.7008	1370.98	12.6416	45.5686	1371.8	12.395	46.0883	1370.71	12.3291	45.624	1371.98	12.228	45.7011	1371.8
	472	9	1501.77	14.8745	0.375348	1.04341	2.08619	0.00453922	IPI00306718.3	Gene_Symbol=SYCP2 Synaptonemal complex protein 2	R.IKPPLQMTSSAEK.P	3.1842	1502.77	0.310614	10.7333	14.9622	1501.98	11.3215	15.7925	1500.97	11.0931	14.8005	1501.77	10.077	14.8935	1501.8	9.88603	14.7428	1501.8	10.0547	14.4281	1501.98
	94	9	1429.9	47.9553	0.136375	0.336327	1.26048	0.0341085	IPI00029308.3	Gene_Symbol=SSX3 synovial sarcoma, X breakpoint 3 isoform b	K.VSEKIVYVYM*KR.K	2.5974	1430.91	0.1478	12.8001	47.8566	1429.89	12.5812	47.9318	1430.07	12.7099	47.925	1430.07	12.5307	48.2419	1429.71	12.2625	47.9255	1429.7	12.289	48.0278	1430.07
	919	9	1089.06	20.7893	0.449532	0.906773	1.86174	0.00782665	IPI00020542.3	Gene_Symbol=SLC22A11 Isoform 1 of Solute carrier family 22 member 11	R.INGHKEAKNLTIEVLMSSVK.E	2.6269	1090.07	0.373851	12.5618	21.2087	1088.71	12.2241	21.2825	1088.8	12.4405	21.1528	1088.71	11.4592	20.584	1089.71	11.789	20.3775	1089.06	11.2579	20.1221	1089.62
	52	9	1545.8	40.6922	0.191083	-0.289861	0.81749	0.0286022	IPI00003377.1	Gene_Symbol=SFRS7 Isoform 1 of Splicing factor, arginine/serine-rich 7	R.NPPGFAFVEFEDPR.D	2.3838	1546.81	0.081704	14.4898	40.768	1545.8	14.664	40.5657	1545.7	14.6499	40.479	1545.8	14.922	41.1422	1545.7	14.9871	40.6147	1545.8	14.7643	40.6915	1545.8
	521	8	1137.25	18.3006	0.249521	-0.886675	0.553003	0.0306006	IPI00215884.4	Gene_Symbol=SFRS1 Isoform ASF-1 of Splicing factor, arginine/serine-rich 1	R.IYVGNLPPDIR.T	2.7842	1138.26	0.437837	12.3893	18.3354	1137.07	11.777	18.0169	1137.25				12.9882	18.8462	1137.8	12.9865	18.1587	1137.8	12.9348	18.3459	1137.62
	1085	5	1511.11	40.8353	0.122375	-0.69897	0.615902	0.0012644	IPI00215884.4	Gene_Symbol=SFRS1 Isoform ASF-1 of Splicing factor, arginine/serine-rich 1	R.DGTGVVEFVR.K	3.3705	1512.12	0.0461788	12.0687	40.7381	1511.08				11.979	40.6808	1511.08	12.7768	40.9794	1511.16	12.6514	40.8842	1511.16	12.7402	40.8939	1511.08
	486	8	1443.15	19.2837	0.610957	-1.35183	0.391542	6.79233e-05	IPI00215884.4	Gene_Symbol=SFRS1 Isoform ASF-1 of Splicing factor, arginine/serine-rich 1	R.EAGDVCYADVYR.D	2.5197	1444.16	0.545239	11.3595	19.1187	1442.98	11.5129	19.1846	1442.71	11.5042	18.9215	1443.16	12.9323	19.6407	1442.89	12.7616	18.9009	1442.89	12.7382	18.9854	1442.89
	152	9	1315.9	45.9691	0.164652	0.428776	1.34198	0.0165139	IPI00005129.8	Gene_Symbol=SCAMP1 Isoform 1 of Secretory carrier-associated membrane protein 1	K.VHGLYRTTGASFEK.A	4.1612	1316.91	0.22248	12.52	45.7069	1315.7	12.5101	45.9345	1316.26	12.6709	45.8914	1315.8	12.3235	46.326	1315.8	12.0126	45.8837	1316.07	12.0785	46.0342	1316.07
	497	9	1428.6	42.8563	0.656795	0.804709	1.76528	0.0193305	IPI00179330.6	Gene_Symbol=RPS27A;UBC;UBB ubiquitin and ribosomal protein S27a precursor	K.TITLEVEPSDTIENVK.A	3.387	1429.6	0.426025	12.2235	42.3207	1427.71	12.7451	43.6401	1428.8	12.8095	43.4708	1428.71	11.671	42.127	1428.71	11.6983	42.7907	1428.6	11.9947	43.4803	1428.89
	517	9	1549.62	48.4067	0.139465	-0.391317	0.76193	0.00685402	IPI00215780.5	Gene_Symbol=RPS19 40S ribosomal protein S19	K.DVNQQEFVR.A	2.4547	1550.62	0.227614	13.4708	48.3556	1549.43	13.3605	48.466	1549.62	13.521	48.4201	1549.62	13.817	48.7243	1549.62	13.9559	48.3724	1549.88	13.7533	48.3665	1550.07
	349	9	1046.78	13.0589	0.156895	0.538012	1.46269	0.0183844	IPI00155168.2	Gene_Symbol=PTPRC Protein tyrosine phosphatase, receptor type, C	K.QDANCVNPLGAPEK.L	2.2056	1047.79	0.117642	12.0894	13.0584	1046.98	12.107	12.8498	1046.71	11.6989	13.0317	1046.71	11.367	13.4267	1046.71	11.4042	12.9884	1046.71	11.5101	13.0197	1046.78
	9	9	1527.98	40.0509	0.162054	0.173911	0.887616	0.0290646	IPI00155168.2	Gene_Symbol=PTPRC Protein tyrosine phosphatase, receptor type, C	K.QTYGDIEVDLK.D	2.3354	1528.99	0.00223665	16.0502	40.0932	1527.98	16.1397	39.9505	1527.98	16.141	39.8843	1527.98	16.0031	40.4462	1527.98	15.9491	40.0343	1527.98	15.8569	40.064	1527.98
	761	9	1484.97	41.722	0.135146	0.151901	1.11088	0.00535041	IPI00155168.2	Gene_Symbol=PTPRC Protein tyrosine phosphatase, receptor type, C	R.DPPSEPSPLEAEFQR.L	3.6168	1485.97	0.053601	13.7839	41.8281	1484.98	13.7568	41.5735	1485.08	13.8106	41.5976	1484.97	13.6739	42.0035	1484.98	13.5952	41.7382	1484.97	13.6266	41.7883	1484.97
	312	9	1087.61	47.3718	0.153914	0.464639	1.37891	0.026203	IPI00013164.4	Gene_Symbol=PRPH Isoform 1 of Peripherin	K.NLQEAEEWYK.S	2.914	1088.62	0.502862	12.1522	47.3721	1087.8	11.9477	47.3439	1087.8	12.2592	47.4054	1087.61	11.6553	47.7553	1087.8	11.483	47.2914	1088.07	11.8269	47.3581	1087.43
	11	9	974.721	42.3695	0.142327	-0.646651	0.644701	0.0100823	IPI00013164.4	Gene_Symbol=PRPH Isoform 1 of Peripherin	K.LLEGEESR.I	2.8821	975.728	0.158819	12.8484	42.4135	974.531	12.3882	42.2986	974.982	12.4955	42.2383	974.713	13.2236	42.7187	974.531	13.2628	42.3675	974.8	13.1857	42.3924	974.8
	167	9	1794.08	49.007	0.197904	0.203565	1.15051	0.0435734	IPI00025252.1	Gene_Symbol=PDIA3 Protein disulfide-isomerase A3 precursor	K.SEPIPESNDGPVK.V	2.4009	1795.09	0.168928	12.4547	48.9093	1793.89	12.3312	49.0572	1794.16	12.3464	49.1548	1794.26	12.0829	49.364	1793.98	12.282	48.9373	1793.79	12.1568	48.7679	1794.07
	129	9	1380.88	27.7473	0.212985	1.30842	2.47581	3.79111e-05	IPI00398020.7	Gene_Symbol=ODZ3 Teneurin-3	R.QDGM*FDLVANGGASLTLVFER.S	4.032	1381.89	0.114777	14.0988	27.8485	1380.71	13.9955	27.7938	1380.89	13.9574	27.7495	1380.98	12.7842	28.2462	1380.98	12.7295	27.5822	1380.98	12.6128	27.7316	1380.89
	527	9	1170.98	34.4502	0.164864	0.247639	1.18913	0.0136215	IPI00004657.1	Gene_Symbol=MICA;LOC730410;HLA-C;HLA-B HLA class I histocompatibility antigen, B-7 alpha chain precursor	K.WAAVVVPSGEEQR.Y	4.0043	1171.99	0.135248	12.6607	34.4978	1170.98	12.467	34.4548	1171.16	12.5188	34.3457	1170.98	12.2862	34.8117	1170.98	12.2957	34.4705	1170.71	12.3217	34.4766	1171.16
	170	9	1409.88	42.2929	0.18871	0.362626	1.28525	0.00912997	IPI00291006.1	Gene_Symbol=MDH2 Malate dehydrogenase, mitochondrial precursor	R.ANTFVAELK.G	3.3531	1410.89	0.229822	12.9318	42.3902	1409.89	12.7711	42.2879	1410.26	12.7966	42.2486	1410.07	12.5274	42.739	1409.8	12.5302	42.0699	1409.89	12.3539	42.2702	1410.07
	629	9	1429.75	32.352	0.246722	0.555993	1.45178	0.0496419	IPI00556589.3	Gene_Symbol=LOC650788 similar to 40S ribosomal protein S28	R.EGDVLTLLESER.E	3.549	1430.76	0.477608	12.3322	32.3889	1430.07	12.3762	32.4982	1429.8	12.1101	32.3578	1430.07	11.7266	32.6797	1429.75	12.027	32.0133	1430.07	11.3968	32.6976	1429.75
	71	9	1790.01	50.4671	0.15122	0.395676	1.31506	0.00117771	IPI00873576.1	Gene_Symbol=LOC646262 hypothetical protein	R.PSGQMYSTAADLAK.L	4.4806	1791.02	0.119708	15.1033	50.3951	1789.97	15.0091	50.4494	1789.98	15.049	50.5029	1789.98	14.6996	50.8474	1790.26	14.6954	50.399	1789.89	14.5793	50.4685	1790.16
	308	9	1149.91	28.0601	0.177814	0.858843	1.81271	3.47156e-05	IPI00005859.2	Gene_Symbol=KRT75 keratin 75	R.NLDLDSIIAEVK.A	2.4238	1150.92	0.124302	13.3807	28.1982	1149.8	13.3235	28.1222	1149.89	13.3195	28.0584	1149.8	12.5468	28.4091	1150.07	12.4172	27.7962	1149.91	12.4833	28.1064	1149.89
	33	9	1582.84	44.84	0.146018	-1.39085	0.38117	2.27371e-05	IPI00005859.2	Gene_Symbol=KRT75 keratin 75	R.FLEQQNK.V	2.2122	1583.85	0.0821229	14.1269	44.8255	1582.79	13.9967	44.7623	1582.89	14.07	44.7051	1582.8	15.5183	45.2015	1582.8	15.4881	44.7953	1582.89	15.3596	44.834	1582.71
	221	9	1736.08	55.3294	0.194938	-0.690788	0.618912	0.000987861	IPI00021304.1	Gene_Symbol=KRT2 Keratin, type II cytoskeletal 2 epidermal	K.YEELQVTVGR.H	4.906	1737.09	0.501332	11.1379	55.2215	1736.71	11.0473	55.5441	1735.98	11.2081	55.3253	1736.98	11.9178	55.535	1735.43	11.8498	55.314	1735.98	11.6978	55.4477	1735.71
	119	9	1382.99	51.3412	0.167793	1.39807	2.62658	0.000249448	IPI00021304.1	Gene_Symbol=KRT2 Keratin, type II cytoskeletal 2 epidermal	K.VDLLNQEIEFLK.V	3.9494	1384	0.0946468	13.4958	51.2181	1382.97	13.3642	51.2954	1382.89	13.3202	51.3734	1382.89	12.1104	51.7574	1382.98	11.7951	51.2592	1383.08	12.0805	51.3368	1383.07
	103	9	1301.9	64.403	0.0400071	1.12204	2.17875	0.00011937	IPI00021304.1	Gene_Symbol=KRT2 Keratin, type II cytoskeletal 2 epidermal	K.LNDLEEALQQAK.E	4.8895	1302.91	0.117884	13.0678	64.3877	1301.98	13.1302	64.3847	1301.8	13.278	64.4068	1301.98	12.1043	64.4197	1301.88	12.0476	64.4158	1301.88	11.958	64.3908	1301.8
	323	9	1322.88	32.5002	0.178458	1.0794	2.14169	0.00403205	IPI00009865.2	Gene_Symbol=KRT10 Keratin, type I cytoskeletal 10	K.YENEVALR.Q	3.0342	1323.89	0.131549	13.1892	32.503	1323.16	13.7827	32.5904	1322.89	13.6051	32.5184	1322.89	12.413	32.9083	1322.88	12.537	32.3163	1322.89	12.3888	32.3956	1322.71
	784	9	1427.83	30.291	0.124235	0.915588	1.89208	0.00108138	IPI00009865.2	Gene_Symbol=KRT10 Keratin, type I cytoskeletal 10	K.IRLENEIQTYR.S	3.401	1428.84	0.134778	12.9794	30.3627	1427.8	12.6781	30.2006	1427.71	12.7158	30.3087	1428.07	11.9812	30.5716	1427.98	11.8275	30.1463	1427.83	11.8179	30.309	1427.83
	171	9	1168.97	57.5963	0.0972517	1.48912	2.81041	0.000119246	IPI00009865.2	Gene_Symbol=KRT10 Keratin, type I cytoskeletal 10	R.AETECQNTEYQQLLDIK.I	3.8419	1169.98	0.114531	12.9634	57.4778	1169.16	12.9215	57.5706	1168.98	13.1757	57.5992	1168.89	11.4663	57.7745	1168.89	11.472	57.6023	1169.16	11.655	57.699	1168.89
	16	9	1059.76	13.3088	0.190424	0.716829	1.64808	0.00409373	IPI00009865.2	Gene_Symbol=KRT10 Keratin, type I cytoskeletal 10	R.SLLEGEGSSGGGGR.G	2.4949	1060.77	0.0831331	13.1019	13.4517	1059.8	12.79	13.1573	1059.62	12.8129	13.1683	1059.62	12.2842	13.7606	1059.8	12.0547	13.2037	1059.8	12.2154	13.2591	1059.8
	503	9	1087.13	40.5161	0.814504	0.992695	2.02954	0.0298311	IPI00009865.2	Gene_Symbol=KRT10 Keratin, type I cytoskeletal 10	R.VLDELTLTK.A	2.2735	1088.14	0.478035	12.2129	39.2489	1087.8	11.4313	40.8989	1086.89	12.213	39.0523	1087.8	11.2156	41.4999	1086.89	10.9664	40.9337	1086.61	10.6972	40.6363	1087.13
	201	9	2253.33	55.8997	0.131756	0.549053	1.45716	0.0146681	IPI00009865.2	Gene_Symbol=KRT10 Keratin, type I cytoskeletal 10	R.SQYEQLAEQNRK.D	2.2011	2254.34	0.178673	12.8413	55.8501	2253.25	12.83	55.8131	2253.16	13.0381	55.9247	2253.16	12.5445	56.1828	2253.35	12.3706	56.0173	2253.35	12.147	55.7536	2253.24
	1015	5	1235.91	32.5516	0.193457	0.584022	1.50212	0.00448977	IPI00009865.2	Gene_Symbol=KRT10 Keratin, type I cytoskeletal 10	R.ALEESNYELEGK.I	2.2592	1236.92	0.164158	12.4186	32.5387	1236.07				12.2261	32.3974	1236.07	11.7275	32.8856	1235.7	11.7739	32.478	1235.8	11.7137	32.4581	1235.89
	98	9	1311.88	33.8952	0.159443	-0.62647	0.643616	0.00899415	IPI00220327.3	Gene_Symbol=KRT1 Keratin, type II cytoskeletal 1	K.LNDLEDALQQAK.E	2.2423	1312.89	0.094766	13.1408	34.0041	1311.89	13.0036	33.8038	1311.98	13.1242	33.7957	1312.07	13.8916	34.2578	1311.88	13.4748	33.9327	1311.8	13.7816	33.8829	1311.8
	174	9	1131.73	26.6917	0.257705	0.391183	1.30816	0.00805507	IPI00220327.3	Gene_Symbol=KRT1 Keratin, type II cytoskeletal 1	R.SLDLDSIIAEVK.A	3.3425	1132.74	0.0886985	13.8339	26.7897	1131.62	13.7817	26.7806	1131.62	13.7512	26.7665	1131.7	13.5421	27.2616	1131.8	13.2837	26.4092	1131.62	13.3674	26.6744	1131.8
	86	9	1474.98	31.4492	0.117081	1.15074	2.21991	0.000265945	IPI00220327.3	Gene_Symbol=KRT1 Keratin, type II cytoskeletal 1	K.SLNNQFASFIDK.V	4.6977	1475.99	0.12157	14.4232	31.5165	1474.89	14.1956	31.4625	1475.08	14.3328	31.4249	1474.79	13.2981	31.7118	1475.08	13.1312	31.4503	1474.89	13.0702	31.3931	1475.08
	619	9	972.904	31.3268	0.209757	1.1718	2.25354	0.000719603	IPI00220327.3	Gene_Symbol=KRT1 Keratin, type II cytoskeletal 1	R.TNAENEFVTIK.K	3.078	973.911	0.123888	12.5228	31.4956	972.982	12.6312	31.2605	972.982	12.8299	31.3484	972.982	11.6538	31.7113	972.982	11.4555	30.991	972.982	11.3592	31.4593	972.619
	411	9	2209.08	61.8663	0.15133	-2.08086	0.237432	0.000171614	IPI00291792.2	Gene_Symbol=ITGB2 Integrin beta-2 precursor	R.ALNEITESGR.I	2.5388	2210.09	0.462917	11.1694	61.834	2209.61	10.7271	61.8714	2209.08	10.9127	61.7902	2207.99	12.9596	61.8697	2209.16	13.1836	61.947	2209.35	12.9086	61.959	2209.16
	753	9	1320.07	58.4596	0.157711	1.51569	2.86099	0.000684136	IPI00103356.2	Gene_Symbol=ITGB2 Integrin beta	R.TTEGCLNPR.R	3.6637	1321.08	0.163431	11.4466	58.3307	1320.26	11.6559	58.348	1320.07	11.8457	58.3968	1319.98	9.93229	58.7279	1320.07	10.1568	58.6013	1320.07	10.3121	58.6231	1320.07
	968	9	955.119	19.6626	0.561473	-0.4674	0.717796	0.0253628	IPI00001453.2	Gene_Symbol=INA Alpha-internexin	R.EYQDLLNVK.M	2.2706	956.126	0.563662	11.3733	19.2202	954.713	11.4238	19.5882	955.119	11.302	19.5222	955.119	11.6408	20.2033	954.982	12.0801	19.6913	954.982	11.7805	19.3323	954.982
	983	9	1532.97	53.7142	0.74737	0.770364	1.68325	0.042364	IPI00007765.5	Gene_Symbol=HSPA9 Stress-70 protein, mitochondrial precursor	R.TTPSVVAFTADGER.L	4.6566	1533.98	0.268026	11.9112	54.0598	1533.08	11.7407	52.6006	1532.34	12.2355	54.1428	1533.08	11.6127	54.2434	1532.97	10.8815	54.0046	1532.97	11.0823	54.0412	1532.97
	208	9	1638.94	46.7741	0.229886	-0.277289	0.823946	0.0196205	IPI00003362.2	Gene_Symbol=HSPA5 HSPA5 protein	K.ELEEIVQPIISK.L	2.6054	1639.95	0.183182	12.4135	46.7172	1638.98	12.5277	46.8058	1639.07	12.4369	46.802	1638.89	12.8597	47.2286	1639.25	12.7106	46.413	1639.07	12.6397	46.8896	1638.7
	1	9	1483.9	33.1139	0.188997	-0.10235	0.931472	0.027852	IPI00003362.2	Gene_Symbol=HSPA5 HSPA5 protein	R.TWNDPSVQQDIK.F	2.7727	1484.91	0.0954785	15.6504	33.1919	1483.98	15.7044	33.1118	1483.8	15.7166	33.0407	1483.88	15.7713	33.563	1483.8	15.8377	33.0524	1483.8	15.7694	33.128	1483.98
	408	8	1359.88	57.2163	0.0845867	-0.474194	0.720356	0.00302154	IPI00003362.2	Gene_Symbol=HSPA5 HSPA5 protein	R.NELESYAYSLK.N	4.0246	1360.89	0.114555	11.2264	57.1163	1359.89	11.2362	57.1547	1359.89	11.0549	57.1744	1360.07	11.5888	57.3529	1359.8	11.6169	57.309	1359.7	11.7344	57.2545	1359.89
	149	9	2317.32	24.4171	0.112571	-0.210751	0.864013	0.0161247	IPI00003362.2	Gene_Symbol=HSPA5 HSPA5 protein	R.IINEPTAAAIAYGLDK.R	2.7215	2318.33	0.16771	16.0008	24.4197	2317.35	15.9172	24.471	2317.16	16.0398	24.465	2317.35	16.273	24.6459	2317.16	16.164	24.2363	2317.35	16.1531	24.4343	2317.35
	100	9	1722.97	49.4705	0.113732	0.496821	1.40898	0.000941171	IPI00027230.3	Gene_Symbol=HSP90B1 Endoplasmin precursor	K.GVVDSDDLPLNVSR.E	3.8397	1723.98	0.131091	13.4002	49.3952	1722.89	13.4018	49.4392	1722.97	13.3822	49.4071	1722.98	12.9899	49.7526	1722.98	12.9086	49.4492	1722.98	12.7953	49.5302	1723.16
	548	8	898.763	20.87	0.159789	0.299319	1.22479	0.0492749	IPI00013881.6	Gene_Symbol=HNRPH1 Heterogeneous nuclear ribonucleoprotein H	R.STGEAFVQFASQEIAEK.A	2.8657	899.77	0.152664	12.1471	20.897	898.713	12.1817	20.7789	898.982	12.0881	20.6435	898.763	11.6365	21.1644	898.524	11.9777	20.9254	898.713	11.9048	20.9691	898.713
	346	9	1289.9	15.1629	0.154411	0.37116	1.2965	0.0139939	IPI00011274.3	Gene_Symbol=HNRPDL Isoform 1 of Heterogeneous nuclear ribonucleoprotein D-like	K.VFVGGLSPDTSEEQIK.E	2.3718	1290.91	0.0961644	12.1709	15.2504	1289.8	11.8976	15.0604	1289.9	12.0829	15.0213	1289.98	11.7125	15.497	1289.8	11.604	15.1434	1289.8	11.7214	15.0144	1289.88
	630	8	1659.23	49.704	0.141033	0.31264	1.24768	0.0340298	IPI00478472.3	Gene_Symbol=GREB1 GREB1 protein isoform a	K.GATLCVICQDRSSLRQTVVR.L	5.0398	1660.23	0.201556	12.3123	49.499	1659.16	12.1116	49.738	1658.79	11.9745	49.6443	1659.44	11.8079	49.9454	1659.23	11.8088	49.777	1659.35	11.8438	49.5926	1659.35
	316	9	1329	64.1797	0.0722262	0.757318	1.6894	2.4771e-05	IPI00419908.4	Gene_Symbol=GPR179 Probable G-protein coupled receptor 179 precursor	R.GSSEAAGSVETR.V	4.2602	1330.01	0.169486	12.4177	64.2118	1328.89	12.4192	64.2112	1329.08	12.4204	64.192	1328.79	11.6784	64.2529	1329.01	11.711	64.0795	1329.16	11.5959	64.2544	1328.98
	32	9	1864.13	47.1625	0.139991	-0.381203	0.76754	0.00189965	IPI00026268.3	Gene_Symbol=GNB1 Guanine nucleotide-binding protein G(I)/G(S)/G(T) subunit beta-1	R.LFVSGACDASAK.L	2.436	1865.14	0.120762	12.4231	47.1373	1864.26	12.3556	47.0966	1864.07	12.3134	47.1226	1864.16	12.8105	47.5299	1863.98	12.7573	47.1219	1864.07	12.668	47.1582	1864.34
	166	9	1532.12	59.702	0.0842755	0.361881	1.28254	0.0230034	IPI00219018.7	Gene_Symbol=GAPDH Glyceraldehyde-3-phosphate dehydrogenase	R.VPTANVSVVDLTCR.L	2.3865	1533.13	0.241293	11.2	59.7329	1532.52	11.0755	59.6841	1532.07	11.0137	59.8588	1531.98	10.7333	59.7401	1531.89	10.8818	59.7467	1531.89	10.5885	59.5912	1531.88
	578	9	1532.8	41.9759	0.132855	0.718662	1.62186	0.0230015	IPI00022143.3	Gene_Symbol=FAM62A Isoform 1 of Protein FAM62A	R.QLLDDEEQLTAK.T	2.6796	1533.81	0.385895	12.7081	41.9489	1533.07	12.5364	42.0129	1532.98	12.4999	42.0239	1532.71	12.1051	42.2705	1532.8	11.9945	41.9709	1533.35	11.4887	41.8135	1532.26
	773	8	1397.06	47.5441	0.160656	0.656896	1.5831	0.0123351	IPI00642462.1	Gene_Symbol=ELMO2 ELMO2 protein	*ERTQSSNMETR.L	3.1842	1398.06	0.212406	12.2973	47.4024	1397.16	12.1557	47.4963	1396.98	11.9752	47.3952	1396.89	11.466	47.9046	1396.89				11.5057	47.5948	1397.06
	187	9	1103.84	14.7121	0.204138	0.474299	1.38722	0.00962011	IPI00301936.3	Gene_Symbol=ELAVL1 ELAV-like protein 1	R.VLVDQTTGLSR.G	2.5452	1104.85	0.128822	11.6609	14.7169	1103.8	11.4974	14.6365	1103.8	11.464	14.5067	1104.07	11.0096	15.1285	1103.8	10.9622	14.6385	1103.98	11.2276	14.4411	1103.62
	555	9	1190.59	22.1173	0.30241	0.312028	1.2389	0.0487541	IPI00025252.1	Gene_Symbol=DOK7 Isoform 2 of Protein Dok-7	R.LAPEYEAAATR.L	2.6644	1191.6	0.378991	12.0645	22.1019	1190.71	11.9678	22.1909	1190.61	12.19	22.2484	1189.62	11.6579	22.6784	1190.8	11.685	21.6079	1190.59	11.9433	22.1915	1190.71
	145	9	1092.94	26.3869	0.218665	1.0849	2.11496	0.000332356	IPI00006091.2	Gene_Symbol=DMD Isoform 4 of Dystrophin	K.LAVLKADLEKK.K	4.0499	1093.95	0.090879	13.343	26.4366	1092.98	13.3792	26.4874	1092.98	13.2504	26.3991	1092.98	12.4084	26.8387	1092.89	12.1217	26.1212	1092.71	12.1878	26.4893	1092.98
	378	8	1188.74	26.8981	0.238931	0.328977	1.25482	0.0163595	IPI00015911.1	Gene_Symbol=DLD Dihydrolipoyl dehydrogenase, mitochondrial precursor	K.ADGGTQVIDTK.N	2.5742	1189.75	0.155469	13.8281	26.9769	1188.61	13.7775	26.992	1188.71				13.3754	27.3927	1188.98	13.5385	26.6238	1188.61	13.5076	26.9259	1188.71
	809	6	1437.95	27.7302	0.124355	0.946065	1.92712	0.00140401	IPI00003269.1	Gene_Symbol=DKFZp686D0972 hypothetical protein LOC345651	R.SYELPDGQVITIGNER.F	2.2748	1438.96	0.17763	12.9385	27.8863	1438.07	12.8106	27.8052	1437.8	12.7674	27.7608	1437.89				11.9578	27.5197	1437.8	11.8278	27.6848	1438.26
	179	9	1167.02	32.8421	0.186358	-0.281451	0.825023	0.0226483	IPI00304587.4	Gene_Symbol=DISP2 Protein dispatched homolog 2	R.AAAGTSRLLFQR.L	3.6239	1168.03	0.275123	11.8043	32.7888	1166.89	11.9929	32.8785	1167.7	11.737	32.561	1166.89	12.1558	33.2405	1166.79	12.1065	32.8752	1166.98	12.1162	32.9228	1167.16
	188	9	1265.31	35.416	0.183831	0.489505	1.40215	0.0113212	IPI00021785.2	Gene_Symbol=COX5B Cytochrome c oxidase subunit 5B, mitochondrial precursor	R.EDPNLVPSISNK.R	3.3808	1266.31	0.553326	13.0181	35.3733	1264.89	12.8101	35.2781	1265.16	12.8186	35.1482	1265.16	12.4727	35.7596	1264.98	12.4862	35.2556	1264.71	12.2194	35.4964	1264.8
	944	9	1132.21	24.2146	0.508566	1.26047	2.405	0.00127522	IPI00023736.2	Gene_Symbol=CORO2A Coronin-2A	K.KLMSTGTSRWNNR.Q	2.2073	1133.21	0.376249	12.8395	23.8407	1132.61	12.4054	23.7936	1132.62	12.6996	23.8503	1132.25	11.2433	24.3002	1132.53	11.5509	25.2217	1131.62	11.3688	23.9549	1132.21
	4	9	1426.87	33.5048	0.216978	0.278006	1.21266	0.00333819	IPI00010133.3	Gene_Symbol=CORO1A Coronin-1A	R.AAPEASGTPSSDAVSR.L	2.7793	1427.88	0.0626025	17.1057	33.6268	1426.89	17.1155	33.5324	1426.89	17.2098	33.4442	1426.89	16.8089	34.0112	1426.89	16.8792	33.3817	1426.89	16.9088	33.4949	1426.89
	792	8	1463.22	36.3474	0.161858	0.233494	1.17643	0.018052	IPI00300659.4	Gene_Symbol=CDC73 Parafibromin	K.NIFAILQSVKAR.E	3.169	1464.23	0.414948	11.7728	36.5247	1462.89	11.6669	36.327	1463.7	11.6545	36.1914	1463.98	11.4511	36.5165	1463.22	11.4781	36.418	1462.89
	76	9	905.853	12.9	0.196442	0.633984	1.57058	0.0189608	IPI00418774.3	Gene_Symbol=CCDC73 Isoform 1 of Coiled-coil domain-containing protein 73	K.EAM*AVFKKQLQM*K.M	2.389	906.86	0.0907892	12.7776	12.99	905.804	12.5798	12.7078	905.804	12.2202	12.8643	906.073	11.8469	13.378	905.891	11.8726	12.8013	905.804	11.956	12.859	905.804
	40	9	1940.06	49.5896	0.123616	-1.09154	0.468744	2.93994e-05	IPI00020984.1	Gene_Symbol=CANX Calnexin precursor	R.IVDDWANDGWGLK.K	2.6981	1941.07	0.114914	13.3064	49.5084	1940.07	13.3105	49.5734	1940.07	13.3498	49.5601	1940.26	14.5083	49.9068	1939.89	14.393	49.5745	1940.07	14.3401	49.5945	1940.07
	368	9	1973.2	57.6787	0.114367	-0.227797	0.853741	0.0280105	IPI00020599.1	Gene_Symbol=CALR Calreticulin precursor	K.EQFLDGDGWTSR.W	4.9689	1974.2	0.23297	11.4708	57.5955	1973.2	11.6232	57.5359	1972.97	11.5776	57.6855	1973.62	11.8583	57.8737	1973.16	11.8079	57.5684	1973.35	11.6888	57.7688	1972.79
	64	9	1434.98	49.4742	0.185899	0.293475	1.22472	0.0302659	IPI00014230.1	Gene_Symbol=C1QBP Complement component 1 Q subcomponent-binding protein, mitochondrial precursor	K.AFVDFLSDEIKEER.K	4.2926	1435.99	0.207598	11.9638	49.4023	1434.71	12.0404	49.4256	1434.71	12.1585	49.486	1435.16	11.6258	49.924	1434.89	11.8032	49.3285	1434.97	11.8532	49.5302	1435.07
	393	9	1987.14	57.5253	0.129172	0.167478	1.12294	0.0186028	IPI00014230.1	Gene_Symbol=C1QBP Complement component 1 Q subcomponent-binding protein, mitochondrial precursor	R.EVSFQSTGESEWK.D	3.8329	1988.15	0.173592	13.1124	57.3443	1987.43	13.1674	57.439	1987.16	13.2109	57.4628	1987.16	12.9906	57.7761	1987.16	12.9416	57.6376	1986.8	13.056	57.6156	1987.16
	1118	5	992.873	22.3643	0.434975	1.22499	2.30752	0.0107611	IPI00400850.2	Gene_Symbol=C19orf2 C19orf2 protein	R.INTGKNTTLK.F	2.9074	993.88	0.149398	12.4802	22.3428	992.982				12.412	22.2107	992.982	11.2053	22.9835	992.706	10.9425	21.7882	992.982	11.5155	22.4964	992.713
	386	9	1513.05	36.0996	0.195256	-0.35482	1.78183	0.0052924	IPI00303476.1	Gene_Symbol=ATP5B ATP synthase subunit beta, mitochondrial precursor	R.AIAELGIYPAVDPLDSTSR.I	3.7217	1514.06	0.289057	11.9691	36.4191	1513.8	12.0027	36.0474	1513.05	12.1126	36.0662	1512.98	12.4055	36.4238	1512.97	12.4518	35.8962	1512.98	12.2915	36.0035	1512.8
	403	9	1696.99	58.5289	0.136311	-0.342542	0.786432	0.0139571	IPI00303476.1	Gene_Symbol=ATP5B ATP synthase subunit beta, mitochondrial precursor	K.IGLFGGAGVGK.T	4.3029	1698	0.236323	11.4253	58.6863	1696.61	11.3935	58.4218	1696.98	11.4628	58.6085	1697.16	11.891	58.5971	1696.97	11.6199	58.4064	1696.99	11.7984	58.6369	1697.16
	492	9	1503.5	38.2471	0.692302	0.942832	1.92635	0.000215662	IPI00303476.1	Gene_Symbol=ATP5B ATP synthase subunit beta, mitochondrial precursor	K.VVDLLAPYAK.G	2.6715	1504.51	0.63806	12.6061	39.0074	1503.07	12.7038	38.6512	1502.8	12.8471	38.6727	1502.8	11.7725	37.5378	1504.07	11.818	37.1934	1503.89	11.7379	37.4352	1504.62
	752	8	931.773	13.8653	0.190325	0.744459	2.67317	0.00432695	IPI00014230.1	Gene_Symbol=ATP5B ATP synthase subunit beta, mitochondrial precursor	K.AFVDFLSDEIKEER.K	2.2626	932.781	0.0627332	12.2643	13.9076	931.804	12.1496	13.7188	931.773				11.3601	14.3172	931.773	11.4425	13.7699	931.804	11.5851	13.7822	931.804
	336	9	1308.93	39.0895	0.229131	0.882036	1.83113	0.00621804	IPI00014230.1	Gene_Symbol=ATP5B ATP synthase subunit beta, mitochondrial precursor	R.EVSFQSTGESEWK.D	3.5733	1309.93	0.173431	13.0825	39.2262	1308.89	12.8138	39.0261	1308.8	12.848	38.8868	1308.71	12.2703	39.6397	1308.98	11.7713	38.9728	1308.93	12.0566	39.0969	1308.98
	584	9	1562.88	48.1237	0.167051	-0.684756	0.621831	0.00232416	IPI00440493.2	Gene_Symbol=ATP5A1 ATP synthase subunit alpha, mitochondrial precursor	K.TSIAIDTIINQK.R	2.5449	1563.89	0.108096	11.9316	48.0575	1562.88	11.761	48.1007	1562.88	11.7132	47.9439	1562.89	12.5673	48.5034	1562.89	12.5538	47.9741	1562.61	12.3388	48.1019	1562.89
	564	8	1774.99	51.3448	0.192172	-0.366299	0.777117	0.0263577	IPI00440493.2	Gene_Symbol=ATP5A1 ATP synthase subunit alpha, mitochondrial precursor	K.HALIIYDDLSK.Q	4.2449	1776	0.090681				11.759	51.2347	1774.99	11.9602	51.5457	1774.98	12.202	51.7226	1775.16	12.1756	51.2949	1774.89	12.3	51.1781	1775.07
	35	9	1087.79	15.2861	0.154843	0.812698	1.76106	0.000530175	IPI00007426.1	Gene_Symbol=ARL6IP5 PRA1 family protein 3	R.AWDDFFPGSDR.F	2.8498	1088.8	0.0334521	13.7438	15.415	1087.8	13.5028	15.1688	1087.8	13.7238	15.1812	1087.8	12.8483	15.6312	1087.8	12.8785	15.1833	1087.8	12.8056	15.2111	1087.8
	748	8	1254.59	42.2865	0.143659	0.506012	1.41642	0.0218921	IPI00022434.4	Gene_Symbol=ALB Uncharacterized protein ALB	K.YICENQDSISSK.L	2.2173	1255.59	0.370166	12.6281	42.3124	1254.59				12.5205	42.149	1254.89	12.1335	42.5785	1254.71	12.1693	42.3596	1254.59	11.9022	42.3065	1254.89
	841	9	1416.74	31.2497	0.190589	0.788633	1.70938	0.00704446	IPI00022434.4	Gene_Symbol=ALB Uncharacterized protein ALB	K.VPQVSTPTLVEVSR.N	3.081	1417.75	0.118246	12.2175	31.4074	1416.71	12.1587	31.4183	1416.8	12.2888	31.2092	1416.98	11.7319	31.5372	1416.52	11.3134	31.1401	1416.74	11.2539	31.2845	1416.74
	793	9	1077.95	36.7864	0.180244	0.673726	1.57333	0.0494778	IPI00022434.4	Gene_Symbol=ALB Uncharacterized protein ALB	K.CCTESLVNR.R	2.9532	1078.96	0.108216	11.9003	36.7279	1078.07	11.5068	36.6835	1077.95	11.7994	36.6651	1077.8	11.3231	37.1816	1077.89	10.6441	36.6085	1077.95	11.218	36.9186	1077.8
	200	9	1164.9	24.8584	0.131529	1.38823	0.332421	6.67193e-05	IPI00377187.6	Gene_Symbol=AKNA Isoform 1 of AT-hook-containing transcription factor	R.PLPRQGATLAGR.S	3.751	1165.91	0.138421	13.2854	24.9373	1164.89	13.1342	24.9098	1164.89	13.1616	24.9614	1164.89	11.6812	25.0225	1164.98	11.9052	24.6328	1164.89	11.8301	24.7903	1164.98
	609	8	1224.83	25.1306	0.201236	0.461152	1.37255	0.0198193	IPI00165004.4	Gene_Symbol=AHI1 Isoform 2 of Jouberin	K.AETSTLTISGDTVEGEQK.K	2.7293	1225.83	0.209106				12.1475	25.0435	1224.53	12.1311	25.3169	1224.8	11.618	25.4481	1224.71	11.8333	25.0298	1224.89	11.583	25.063	1224.83
	561	8	1356.84	42.4463	0.159027	0.817813	1.76037	0.000293731	IPI00021439.1	Gene_Symbol=ACTB Actin, cytoplasmic 1	R.GYSFTTTAER.E	4.5675	1357.85	0.298671	13.2153	42.5232	1356.79	13.141	42.4673	1356.89	13.1102	42.3831	1356.89	12.4171	42.7554	1357.16	12.3801	42.2947	1357.08	12.216	42.3492	1356.89
	421	9	1405.13	57.9068	0.118734	0.686288	1.63031	0.0160439	IPI00008603.1	Gene_Symbol=ACTA2 Actin, aortic smooth muscle	K.DSYVGDEAQSKR.G	3.8338	1406.14	0.307268	11.2973	57.8785	1404.98	10.721	57.9866	1405.53	10.9457	58.0337	1404.89	10.3575	57.8516	1405.62	10.3102	57.8624	1405.35	10.2374	57.8334	1405.13
	371	8	1114.85	28.7443	0.116458	0.987862	1.98635	0.00290284	IPI00008603.1	Gene_Symbol=ACTA2 Actin, aortic smooth muscle	K.DSYVGDEAQSK.R	3.1154	1115.85	0.144899	13.3783	28.9282	1114.98	13.1249	28.7852	1114.71	13.3056	28.7721	1114.98				12.3503	28.5247	1114.98	12.2132	28.8014	1114.71
	473	8	1359.35	64.7237	0.585554	0.56525	1.48093	0.00641289	IPI00017855.1	Gene_Symbol=ACO2 Aconitate hydratase, mitochondrial precursor	K.SQFTITPGSEQIR.A	2.404	1360.36	0.509367	12.5021	64.5056	1358.98	12.6478	64.5047	1359.16	12.6885	64.5508	1358.97	11.9954	64.5669	1359.25	12.0997	64.4523	1359.07
	592	9	1532.07	32.8648	0.171748	1.05347	2.076	8.5477e-05	IPI00445774.1	Gene_Symbol=- CDNA FLJ43404 fis, clone OCBBF2017516	R.HFSKEDIYVANKHIK.K	3.1967	1533.08	0.0758241	13.3176	32.8802	1531.98	13.4838	32.8225	1532.07	13.3795	32.7625	1531.98	12.388	33.1817	1532.07	12.3792	32.9737	1532.25	12.2533	33.0041	1532.07
	172	9	1621.11	58.219	0.0627334	0.740702	1.68486	0.00548333	IPI00446695.1	Gene_Symbol=- CDNA FLJ41329 fis, clone BRAMY2047676	R.ALNLGAATVLRRHR.A	3.0504	1622.12	0.13013	12.5369	58.1434	1621.16	12.0746	58.2423	1621.07	12.3323	58.2458	1621.07	11.5283	58.2683	1621.16	11.6047	58.1948	1620.89	11.5885	58.2652	1621.16
