# Supplementary material for: Label-Free Proteomics Reveals Decreased Expression of CD18 and AKNA in Peripheral CD4+ T Cells from Patients with Vogt-Koyanagi-Harada Syndrome
Source: PLoS One. 2011 Jan 28;6(1):e14616. doi: 10.1371/journal.pone.0014616 (PMC3030555; doi:10.1371/journal.pone.0014616)
Supplement: Table S2 — C.V.analysis of all the identified proteins based on at least two peptides.The average CV of the fold changes was 23% for proteins with two or more peptides. (0.06 MB XLS) [file pone.0014616.s005.xls]

## Sheet: Sheet1
	Table S2 C.V.analysis of all the identified proteins based on at least two peptides.The average CV of the fold changes was 23% for proteins with two or more peptides.
	Match #	Profiles	Mass (Da)	Time (min)	Time stdev (min)	Av. Diff. (2Log)	Av. Ratio (Lin)	t-test p	proteinID	ID detail	Peptide	ID Score	MH+ (Da)	Mass stdev (Da)	P08097_NC Int (NC)	P08097_NC Time (NC)	P08097_NC Mass (NC)	P08097_NC_081207024349 Int (NC)	P08097_NC_081207024349 Time (NC)	P08097_NC_081207024349 Mass (NC)	P08097_NC_081207061700 Int (NC)	P08097_NC_081207061700 Time (NC)	P08097_NC_081207061700 Mass (NC)	P08097_VKH Int (VKH)	P08097_VKH Time (VKH)	P08097_VKH Mass (VKH)	P08097_VKH_081206145737 Int (VKH)	P08097_VKH_081206145737 Time (VKH)	P08097_VKH_081206145737 Mass (VKH)	P08097_VKH_081206183048 Int (VKH)	P08097_VKH_081206183048 Time (VKH)	P08097_VKH_081206183048 Mass (VKH)
	840	9	1493.01	18.1454	0.256553	1.56762	2.98814	0.000315428	IPI00418471.6	Gene_Symbol=VIM Vimentin	R.QVDQLTNDK.A	3.3562	1494.02	0.190814	12.3744	18.1524	1492.97	12.1235	18.0404	1493.08	11.917	18.2191	1493.43	10.6256	18.699	1492.71	10.5366	17.7184	1492.98	10.5499	18.1788	1493.01
	795	8	2082	49.0378	0.204724	1.27003	2.41106	1.95198e-05	IPI00418471.6	Gene_Symbol=VIM Vimentin	K.ILLAELEQLK.G	5.5269	2083.01	0.17698	13.2392	48.9324	2082.07	13.124	48.9773	2082.26	13.1522	48.9722	2082.07	11.874	49.4901	2081.98	11.9834	49.0744	2081.99	11.8478	49.1277	2081.62
	667	9	1030.53	38.312	0.359768	1.37245	2.58772	0.00031202	IPI00418471.6	Gene_Symbol=VIM Vimentin	R.SLYASSPGGVYATR.S	3.165	1031.54	0.572496	13.129	38.344	1029.26	13.1237	38.3945	1030.89	13.3666	38.3204	1030.89	11.7542	38.9778	1030.98	12.007	38.4503	1030.71	11.7407	38.3722	1030.98
	525	9	1261.85	20.3619	0.229602	1.71428	3.28351	0.000453127	IPI00418471.6	Gene_Symbol=VIM Vimentin	K.VELQELNDR.F	3.9927	1262.86	0.142804	13.6704	20.4674	1261.8	13.3582	20.369	1262.07	13.2902	20.2376	1262.07	11.7172	20.8946	1261.8	11.9237	20.3003	1261.8	11.5352	20.3669	1261.62
	28	9	944.811	42.2528	0.118973	1.03631	2.55018	3.56946e-05	IPI00418471.6	Gene_Symbol=VIM Vimentin	R.EEAENTLQSFR.Q	2.4172	945.819	0.152452	13.0812	42.2455	944.982	12.9763	42.2	944.713	13.0206	42.1316	944.982	11.9378	42.5421	944.713	12.0716	42.307	944.8	11.9598	42.2469	944.8
	141	9	1197.72	12.668	0.233091	0.360836	2.58636	0.00517286	IPI00418471.6	Gene_Symbol=VIM Vimentin	K.VESLQEEIAFLK.K	3.6068	1198.73	0.0867599	14.2246	12.7627	1197.8	14.4402	12.4893	1197.7	14.3235	12.5036	1197.8	13.9668	13.2279	1197.62	13.9371	12.4796	1197.7	14.0019	12.6349	1197.8
	518	9	1645.19	48.819	0.132702	0.274932	2.40963	0.0124163	IPI00418471.6	Gene_Symbol=VIM Vimentin	R.KVESLQEEIAFLK.K	4.6919	1646.2	0.353389	11.9601	48.7141	1644.89	11.988	48.7817	1644.89	11.8508	48.7892	1644.89	11.6944	49.1002	1645.19	11.7166	48.7124	1645.71	11.5632	48.961	1645.19
	765	9	1311.89	53.6565	0.233564	1.84543	3.61022	0.000299509	IPI00418471.6	Gene_Symbol=VIM Vimentin	R.QDVDNASLAR.L	3.3012	1312.9	0.358138	12.8849	53.5928	1311.8	13.0936	53.5967	1311.62	13.3379	53.6641	1311.7	11.4217	54.0599	1311.89	11.2331	53.4985	1312.8	11.1252	54.0258	1311.89
	160	9	1225.95	58.6548	0.082035	1.32902	2.99484	0.000609748	IPI00418471.6	Gene_Symbol=VIM Vimentin	K.FADLSEAANR.N	2.2679	1226.96	0.203695	13.2908	58.5586	1225.98	13.1956	58.5741	1225.52	13.3555	58.6196	1225.98	11.8485	58.8105	1226.25	11.8011	58.7116	1226.07	12.2052	58.7255	1225.8
						X	2.82463
						S	0.420555
						C.V.	0.148889
	323	9	1322.88	32.5002	0.178458	1.0794	2.14169	0.00403205	IPI00009865.2	Gene_Symbol=KRT10 Keratin, type I cytoskeletal 10	K.YENEVALR.Q	3.0342	1323.89	0.131549	13.1892	32.503	1323.16	13.7827	32.5904	1322.89	13.6051	32.5184	1322.89	12.413	32.9083	1322.88	12.537	32.3163	1322.89	12.3888	32.3956	1322.71
	784	9	1427.83	30.291	0.124235	0.915588	1.89208	0.00108138	IPI00009865.2	Gene_Symbol=KRT10 Keratin, type I cytoskeletal 10	K.IRLENEIQTYR.S	3.401	1428.84	0.134778	12.9794	30.3627	1427.8	12.6781	30.2006	1427.71	12.7158	30.3087	1428.07	11.9812	30.5716	1427.98	11.8275	30.1463	1427.83	11.8179	30.309	1427.83
	171	9	1168.97	57.5963	0.0972517	1.48912	2.81041	0.000119246	IPI00009865.2	Gene_Symbol=KRT10 Keratin, type I cytoskeletal 10	R.AETECQNTEYQQLLDIK.I	3.8419	1169.98	0.114531	12.9634	57.4778	1169.16	12.9215	57.5706	1168.98	13.1757	57.5992	1168.89	11.4663	57.7745	1168.89	11.472	57.6023	1169.16	11.655	57.699	1168.89
	16	9	1059.76	13.3088	0.190424	0.716829	1.64808	0.00409373	IPI00009865.2	Gene_Symbol=KRT10 Keratin, type I cytoskeletal 10	R.SLLEGEGSSGGGGR.G	2.4949	1060.77	0.0831331	13.1019	13.4517	1059.8	12.79	13.1573	1059.62	12.8129	13.1683	1059.62	12.2842	13.7606	1059.8	12.0547	13.2037	1059.8	12.2154	13.2591	1059.8
	503	9	1087.13	40.5161	0.814504	0.992695	2.02954	0.0298311	IPI00009865.2	Gene_Symbol=KRT10 Keratin, type I cytoskeletal 10	R.VLDELTLTK.A	2.2735	1088.14	0.478035	12.2129	39.2489	1087.8	11.4313	40.8989	1086.89	12.213	39.0523	1087.8	11.2156	41.4999	1086.89	10.9664	40.9337	1086.61	10.6972	40.6363	1087.13
	201	9	2253.33	55.8997	0.131756	0.549053	1.45716	0.0146681	IPI00009865.2	Gene_Symbol=KRT10 Keratin, type I cytoskeletal 10	R.SQYEQLAEQNRK.D	2.2011	2254.34	0.178673	12.8413	55.8501	2253.25	12.83	55.8131	2253.16	13.0381	55.9247	2253.16	12.5445	56.1828	2253.35	12.3706	56.0173	2253.35	12.147	55.7536	2253.24
	1015	5	1235.91	32.5516	0.193457	0.584022	1.90212	0.00448977	IPI00009865.2	Gene_Symbol=KRT10 Keratin, type I cytoskeletal 10	R.ALEESNYELEGK.I	2.2592	1236.92	0.164158	12.4186	32.5387	1236.07				12.2261	32.3974	1236.07	11.7275	32.8856	1235.7	11.7739	32.478	1235.8	11.7137	32.4581	1235.89
						X	1.98301
						S	0.431169
						C.V.	0.217432
	98	9	1311.88	33.8952	0.159443	-0.62647	1.24362	0.00899415	IPI00220327.3	Gene_Symbol=KRT1 Keratin, type II cytoskeletal 1	K.LNDLEDALQQAK.E	2.2423	1312.89	0.094766	13.1408	34.0041	1311.89	13.0036	33.8038	1311.98	13.1242	33.7957	1312.07	13.8916	34.2578	1311.88	13.4748	33.9327	1311.8	13.7816	33.8829	1311.8
	174	9	1131.73	26.6917	0.257705	0.391183	1.30816	0.00805507	IPI00220327.3	Gene_Symbol=KRT1 Keratin, type II cytoskeletal 1	R.SLDLDSIIAEVK.A	3.3425	1132.74	0.0886985	13.8339	26.7897	1131.62	13.7817	26.7806	1131.62	13.7512	26.7665	1131.7	13.5421	27.2616	1131.8	13.2837	26.4092	1131.62	13.3674	26.6744	1131.8
	86	9	1474.98	31.4492	0.117081	1.15074	1.91991	0.000265945	IPI00220327.3	Gene_Symbol=KRT1 Keratin, type II cytoskeletal 1	K.SLNNQFASFIDK.V	4.6977	1475.99	0.12157	14.4232	31.5165	1474.89	14.1956	31.4625	1475.08	14.3328	31.4249	1474.79	13.2981	31.7118	1475.08	13.1312	31.4503	1474.89	13.0702	31.3931	1475.08
	619	9	972.904	31.3268	0.209757	1.1718	2.05354	0.000719603	IPI00220327.3	Gene_Symbol=KRT1 Keratin, type II cytoskeletal 1	R.TNAENEFVTIK.K	3.078	973.911	0.123888	12.5228	31.4956	972.982	12.6312	31.2605	972.982	12.8299	31.3484	972.982	11.6538	31.7113	972.982	11.4555	30.991	972.982	11.3592	31.4593	972.619
						X	1.63131
						S	0.414851
						C.V.	0.254306
	386	9	1513.05	36.0996	0.195256	-0.35482	1.78183	0.0052924	IPI00303476.1	Gene_Symbol=ATP5B ATP synthase subunit beta, mitochondrial precursor	R.AIAELGIYPAVDPLDSTSR.I	3.7217	1514.06	0.289057	11.9691	36.4191	1513.8	12.0027	36.0474	1513.05	12.1126	36.0662	1512.98	12.4055	36.4238	1512.97	12.4518	35.8962	1512.98	12.2915	36.0035	1512.8
	403	9	1696.99	58.5289	0.136311	-0.342542	0.786432	0.0139571	IPI00303476.1	Gene_Symbol=ATP5B ATP synthase subunit beta, mitochondrial precursor	K.IGLFGGAGVGK.T	4.3029	1698	0.236323	11.4253	58.6863	1696.61	11.3935	58.4218	1696.98	11.4628	58.6085	1697.16	11.891	58.5971	1696.97	11.6199	58.4064	1696.99	11.7984	58.6369	1697.16
	492	9	1503.5	38.2471	0.692302	0.942832	1.92635	0.000215662	IPI00303476.1	Gene_Symbol=ATP5B ATP synthase subunit beta, mitochondrial precursor	K.VVDLLAPYAK.G	2.6715	1504.51	0.63806	12.6061	39.0074	1503.07	12.7038	38.6512	1502.8	12.8471	38.6727	1502.8	11.7725	37.5378	1504.07	11.818	37.1934	1503.89	11.7379	37.4352	1504.62
	752	8	931.773	13.8653	0.190325	0.744459	2.67317	0.00432695	IPI00014230.1	Gene_Symbol=ATP5B ATP synthase subunit beta, mitochondrial precursor	K.AFVDFLSDEIKEER.K	2.2626	932.781	0.0627332	12.2643	13.9076	931.804	12.1496	13.7188	931.773				11.3601	14.3172	931.773	11.4425	13.7699	931.804	11.5851	13.7822	931.804
	336	9	1308.93	39.0895	0.229131	0.882036	1.83113	0.00621804	IPI00014230.1	Gene_Symbol=ATP5B ATP synthase subunit beta, mitochondrial precursor	R.EVSFQSTGESEWK.D	3.5733	1309.93	0.173431	13.0825	39.2262	1308.89	12.8138	39.0261	1308.8	12.848	38.8868	1308.71	12.2703	39.6397	1308.98	11.7713	38.9728	1308.93	12.0566	39.0969	1308.98
						X	1.79978	1.8
						S	0.672126
						C.V.	0.373448	0.4
	208	9	1638.94	46.7741	0.229886	-0.277289	0.823946	0.0196205	IPI00003362.2	Gene_Symbol=HSPA5 HSPA5 protein	K.ELEEIVQPIISK.L	2.6054	1639.95	0.183182	12.4135	46.7172	1638.98	12.5277	46.8058	1639.07	12.4369	46.802	1638.89	12.8597	47.2286	1639.25	12.7106	46.413	1639.07	12.6397	46.8896	1638.7
	1	9	1483.9	33.1139	0.188997	-0.10235	0.931472	0.027852	IPI00003362.2	Gene_Symbol=HSPA5 HSPA5 protein	R.TWNDPSVQQDIK.F	2.7727	1484.91	0.0954785	15.6504	33.1919	1483.98	15.7044	33.1118	1483.8	15.7166	33.0407	1483.88	15.7713	33.563	1483.8	15.8377	33.0524	1483.8	15.7694	33.128	1483.98
	408	8	1359.88	57.2163	0.0845867	-0.474194	0.720356	0.00302154	IPI00003362.2	Gene_Symbol=HSPA5 HSPA5 protein	R.NELESYAYSLK.N	4.0246	1360.89	0.114555	11.2264	57.1163	1359.89	11.2362	57.1547	1359.89	11.0549	57.1744	1360.07	11.5888	57.3529	1359.8	11.6169	57.309	1359.7	11.7344	57.2545	1359.89
	149	9	2317.32	24.4171	0.112571	-0.210751	0.864013	0.0161247	IPI00003362.2	Gene_Symbol=HSPA5 HSPA5 protein	R.IINEPTAAAIAYGLDK.R	2.7215	2318.33	0.16771	16.0008	24.4197	2317.35	15.9172	24.471	2317.16	16.0398	24.465	2317.35	16.273	24.6459	2317.16	16.164	24.2363	2317.35	16.1531	24.4343	2317.35
						X	0.834947
						S	0.088344
						C.V.	0.105808
	521	8	1137.25	18.3006	0.249521	-0.886675	0.553003	0.0306006	IPI00215884.4	Gene_Symbol=SFRS1 Isoform ASF-1 of Splicing factor, arginine/serine-rich 1	R.IYVGNLPPDIR.T	2.7842	1138.26	0.437837	12.3893	18.3354	1137.07	11.777	18.0169	1137.25				12.9882	18.8462	1137.8	12.9865	18.1587	1137.8	12.9348	18.3459	1137.62
	1085	5	1511.11	40.8353	0.122375	-0.69897	0.615902	0.0012644	IPI00215884.4	Gene_Symbol=SFRS1 Isoform ASF-1 of Splicing factor, arginine/serine-rich 1	R.DGTGVVEFVR.K	3.3705	1512.12	0.0461788	12.0687	40.7381	1511.08				11.979	40.6808	1511.08	12.7768	40.9794	1511.16	12.6514	40.8842	1511.16	12.7402	40.8939	1511.08
	486	8	1443.15	19.2837	0.610957	-1.35183	0.391542	6.79233e-05	IPI00215884.4	Gene_Symbol=SFRS1 Isoform ASF-1 of Splicing factor, arginine/serine-rich 1	R.EAGDVCYADVYR.D	2.5197	1444.16	0.545239	11.3595	19.1187	1442.98	11.5129	19.1846	1442.71	11.5042	18.9215	1443.16	12.9323	19.6407	1442.89	12.7616	18.9009	1442.89	12.7382	18.9854	1442.89
						X	0.520149
						S	0.115732
						C.V.	0.222498
	349	9	1046.78	13.0589	0.156895	0.538012	1.46269	0.0183844	IPI00155168.2	Gene_Symbol=PTPRC Protein tyrosine phosphatase, receptor type, C	K.QDANCVNPLGAPEK.L	2.2056	1047.79	0.117642	12.0894	13.0584	1046.98	12.107	12.8498	1046.71	11.6989	13.0317	1046.71	11.367	13.4267	1046.71	11.4042	12.9884	1046.71	11.5101	13.0197	1046.78
	9	9	1527.98	40.0509	0.162054	0.173911	0.887616	0.0290646	IPI00155168.2	Gene_Symbol=PTPRC Protein tyrosine phosphatase, receptor type, C	K.QTYGDIEVDLK.D	2.3354	1528.99	0.00223665	16.0502	40.0932	1527.98	16.1397	39.9505	1527.98	16.141	39.8843	1527.98	16.0031	40.4462	1527.98	15.9491	40.0343	1527.98	15.8569	40.064	1527.98
	761	9	1484.97	41.722	0.135146	0.151901	1.11088	0.00535041	IPI00155168.2	Gene_Symbol=PTPRC Protein tyrosine phosphatase, receptor type, C	R.DPPSEPSPLEAEFQR.L	3.6168	1485.97	0.053601	13.7839	41.8281	1484.98	13.7568	41.5735	1485.08	13.8106	41.5976	1484.97	13.6739	42.0035	1484.98	13.5952	41.7382	1484.97	13.6266	41.7883	1484.97
						X	1.15373
						S	0.289924
						C.V.	0.251293
	312	9	1087.61	47.3718	0.153914	0.464639	1.37891	0.026203	IPI00013164.4	Gene_Symbol=PRPH Isoform 1 of Peripherin	K.NLQEAEEWYK.S	2.914	1088.62	0.502862	12.1522	47.3721	1087.8	11.9477	47.3439	1087.8	12.2592	47.4054	1087.61	11.6553	47.7553	1087.8	11.483	47.2914	1088.07	11.8269	47.3581	1087.43
	11	9	974.721	42.3695	0.142327	-0.646651	0.644701	0.0100823	IPI00013164.4	Gene_Symbol=PRPH Isoform 1 of Peripherin	K.LLEGEESR.I	2.8821	975.728	0.158819	12.8484	42.4135	974.531	12.3882	42.2986	974.982	12.4955	42.2383	974.713	13.2236	42.7187	974.531	13.2628	42.3675	974.8	13.1857	42.3924	974.8
						X	1.01181
						S	0.519167
						C.V.	0.513109
	221	9	1736.08	55.3294	0.194938	-0.690788	0.618912	0.000987861	IPI00021304.1	Gene_Symbol=KRT2 Keratin, type II cytoskeletal 2 epidermal	K.YEELQVTVGR.H	4.906	1737.09	0.501332	11.1379	55.2215	1736.71	11.0473	55.5441	1735.98	11.2081	55.3253	1736.98	11.9178	55.535	1735.43	11.8498	55.314	1735.98	11.6978	55.4477	1735.71
	119	9	1382.99	51.3412	0.167793	1.39807	2.62658	0.000249448	IPI00021304.1	Gene_Symbol=KRT2 Keratin, type II cytoskeletal 2 epidermal	K.VDLLNQEIEFLK.V	3.9494	1384	0.0946468	13.4958	51.2181	1382.97	13.3642	51.2954	1382.89	13.3202	51.3734	1382.89	12.1104	51.7574	1382.98	11.7951	51.2592	1383.08	12.0805	51.3368	1383.07
	103	9	1301.9	64.403	0.0400071	1.12204	2.17875	0.00011937	IPI00021304.1	Gene_Symbol=KRT2 Keratin, type II cytoskeletal 2 epidermal	K.LNDLEEALQQAK.E	4.8895	1302.91	0.117884	13.0678	64.3877	1301.98	13.1302	64.3847	1301.8	13.278	64.4068	1301.98	12.1043	64.4197	1301.88	12.0476	64.4158	1301.88	11.958	64.3908	1301.8
						X	1.80808
						S	1.05391
						C.V.	0.58289
	64	9	1434.98	49.4742	0.185899	0.293475	1.22472	0.0302659	IPI00014230.1	Gene_Symbol=C1QBP Complement component 1 Q subcomponent-binding protein, mitochondrial precursor	K.AFVDFLSDEIKEER.K	4.2926	1435.99	0.207598	11.9638	49.4023	1434.71	12.0404	49.4256	1434.71	12.1585	49.486	1435.16	11.6258	49.924	1434.89	11.8032	49.3285	1434.97	11.8532	49.5302	1435.07
	393	9	1987.14	57.5253	0.129172	0.167478	1.12294	0.0186028	IPI00014230.1	Gene_Symbol=C1QBP Complement component 1 Q subcomponent-binding protein, mitochondrial precursor	R.EVSFQSTGESEWK.D	3.8329	1988.15	0.173592	13.1124	57.3443	1987.43	13.1674	57.439	1987.16	13.2109	57.4628	1987.16	12.9906	57.7761	1987.16	12.9416	57.6376	1986.8	13.056	57.6156	1987.16
						X	1.17383
						S	0.0719739
						C.V.	0.0613155
	752	8	931.773	13.8653	0.190325	0.744459	1.67317	0.00432695	IPI00014230.1	Gene_Symbol=ATP5B ATP synthase subunit beta, mitochondrial precursor	K.AFVDFLSDEIKEER.K	2.2626	932.781	0.0627332	12.2643	13.9076	931.804	12.1496	13.7188	931.773				11.3601	14.3172	931.773	11.4425	13.7699	931.804	11.5851	13.7822	931.804
	336	9	1308.93	39.0895	0.229131	0.882036	1.83113	0.00621804	IPI00014230.1	Gene_Symbol=ATP5B ATP synthase subunit beta, mitochondrial precursor	R.EVSFQSTGESEWK.D	3.5733	1309.93	0.173431	13.0825	39.2262	1308.89	12.8138	39.0261	1308.8	12.848	38.8868	1308.71	12.2703	39.6397	1308.98	11.7713	38.9728	1308.93	12.0566	39.0969	1308.98
						X	1.75215
						S	0.111694
						C.V.	0.063747
	584	9	1562.88	48.1237	0.167051	-0.684756	0.621831	0.00232416	IPI00440493.2	Gene_Symbol=ATP5A1 ATP synthase subunit alpha, mitochondrial precursor	K.TSIAIDTIINQK.R	2.5449	1563.89	0.108096	11.9316	48.0575	1562.88	11.761	48.1007	1562.88	11.7132	47.9439	1562.89	12.5673	48.5034	1562.89	12.5538	47.9741	1562.61	12.3388	48.1019	1562.89
	564	8	1774.99	51.3448	0.192172	-0.366299	0.777117	0.0263577	IPI00440493.2	Gene_Symbol=ATP5A1 ATP synthase subunit alpha, mitochondrial precursor	K.HALIIYDDLSK.Q	4.2449	1776	0.090681				11.759	51.2347	1774.99	11.9602	51.5457	1774.98	12.202	51.7226	1775.16	12.1756	51.2949	1774.89	12.3	51.1781	1775.07
						X	0.699474
						S	0.109803
						C.V.	0.15698
	748	8	1254.59	42.2865	0.143659	0.506012	1.41642	0.0218921	IPI00022434.4	Gene_Symbol=ALB Uncharacterized protein ALB	K.YICENQDSISSK.L	2.2173	1255.59	0.370166	12.6281	42.3124	1254.59				12.5205	42.149	1254.89	12.1335	42.5785	1254.71	12.1693	42.3596	1254.59	11.9022	42.3065	1254.89
	841	9	1416.74	31.2497	0.190589	0.788633	1.70938	0.00704446	IPI00022434.4	Gene_Symbol=ALB Uncharacterized protein ALB	K.VPQVSTPTLVEVSR.N	3.081	1417.75	0.118246	12.2175	31.4074	1416.71	12.1587	31.4183	1416.8	12.2888	31.2092	1416.98	11.7319	31.5372	1416.52	11.3134	31.1401	1416.74	11.2539	31.2845	1416.74
	793	9	1077.95	36.7864	0.180244	0.673726	1.57333	0.0494778	IPI00022434.4	Gene_Symbol=ALB Uncharacterized protein ALB	K.CCTESLVNR.R	2.9532	1078.96	0.108216	11.9003	36.7279	1078.07	11.5068	36.6835	1077.95	11.7994	36.6651	1077.8	11.3231	37.1816	1077.89	10.6441	36.6085	1077.95	11.218	36.9186	1077.8
						X	1.56638
						S	0.146603
						C.V.	0.0935936
	421	9	1405.13	57.9068	0.118734	0.686288	1.63031	0.0160439	IPI00008603.1	Gene_Symbol=ACTA2 Actin, aortic smooth muscle	K.DSYVGDEAQSKR.G	3.8338	1406.14	0.307268	11.2973	57.8785	1404.98	10.721	57.9866	1405.53	10.9457	58.0337	1404.89	10.3575	57.8516	1405.62	10.3102	57.8624	1405.35	10.2374	57.8334	1405.13
	371	8	1114.85	28.7443	0.116458	0.987862	1.98635	0.00290284	IPI00008603.1	Gene_Symbol=ACTA2 Actin, aortic smooth muscle	K.DSYVGDEAQSK.R	3.1154	1115.85	0.144899	13.3783	28.9282	1114.98	13.1249	28.7852	1114.71	13.3056	28.7721	1114.98				12.3503	28.5247	1114.98	12.2132	28.8014	1114.71
						X	1.80833
						S	0.251755
						C.V.	0.13922
	NOTE: Coefficient of variation (CV) was performed to to evaluate the variation based on intensity ratio of peptides from proteins with two or more peptides.
				C.V.of proteins with three or more peptides
				0.148889
				0.217432
				0.254306
				0.373448
				0.105808
				0.222498
				0.251293
				0.513109
				0.58289
				0.0613155
				0.063747
				0.15698
				0.0935936
				0.13922
				0.227466	(Average CV)
