# Supplementary material for: Label-Free Proteomics Reveals Decreased Expression of CD18 and AKNA in Peripheral CD4+ T Cells from Patients with Vogt-Koyanagi-Harada Syndrome
Source: PLoS One. 2011 Jan 28;6(1):e14616. doi: 10.1371/journal.pone.0014616 (PMC3030555; doi:10.1371/journal.pone.0014616)
Supplement: Table S4 — The molecular function of the identified proteins. (0.08 MB XLS) [file pone.0014616.s007.xls]

## Sheet: Sheet1
Table S4 The molecular function of the identified proteins
Molecular Function	Protein	InputSymbol
GO:0005200 structural constituent of cytoskeleton	KRT1	KRT1
	ACTA2	ACTA2
	VIM	VIM
	ACTB	ACTB
	ACTG1	ACTB
	DMD	DMD
GO:0005515 protein binding	C19orf2	C19orf2
	ACT	DKFZp686D0972
	Q59H50_HUMAN	ITGB2
	ACTA2	ACTA2
	ATP5B	ATP5B
	ALBU_HUMAN	ALB
	ARL6IP5	ARL6IP5
	KRT1	KRT1
	ACTA2	ACTA2
	SFRS1	SFRS1
	VIM	VIM
	ACTB	ACTB
	ATP5A1	ATP5A1
	CORO2A	CORO2A
	ACTG1	ACTB
	DMD	DMD
	ITGB2	ITGB2
	RMP	C19orf2
GO:0005509 calcium ion binding	dystrophin	DMD
	DMD	DMD
	Q59HC3_HUMAN	DMD
	Q6ZP56_HUMAN	CANX
	DMD	DMD
	CANX	CANX
	DMD	DMD
GO:0050824 water binding	ALBU_HUMAN	ALB
GO:0046933 hydrogen-transporting ATP synthase acti..	ATP5B	ATP5B
	ATP5A1	ATP5A1
GO:0046961 hydrogen-transporting ATPase activity, ..	ATP5B	ATP5B
	ATP5A1	ATP5A1
GO:0051082 unfolded protein binding	Q6ZP56_HUMAN	CANX
	CANX	CANX
	HSPA9B	HSPA9B
GO:0005529 sugar binding	Q6ZP56_HUMAN	CANX
	KRT1	KRT1
	CANX	CANX
GO:0015347 sodium-independent organic anion transp..	SLC22A11	SLC22A11
GO:0008553 hydrogen-exporting ATPase activity, pho..	ATP5B	ATP5B
GO:0015643 toxin binding	ALBU_HUMAN	ALB
GO:0003779 actin binding	DMD	DMD
	CORO2A	CORO2A
	DMD	DMD
GO:0030280 structural constituent of epidermis	KRT10	KRT10
GO:0005198 structural molecule activity	VIM	VIM
	KRT10	KRT10
	Q59HC3_HUMAN	DMD
	VIM	VIM
	PRPH	PRPH
GO:0030170 pyridoxal phosphate binding	ALBU_HUMAN	ALB
GO:0008144 drug binding	ALBU_HUMAN	ALB
GO:0005386 carrier activity	Q8IUK7_HUMAN	ALB
	Q86YG0_HUMAN	ALB
	ALBU_HUMAN	ALB
GO:0005344 oxygen transporter activity	VIM	VIM
GO:0005504 fatty acid binding	ALBU_HUMAN	ALB
GO:0008067 metabotropic glutamate, GABA-B-like rec..	GPR179	GPR179
GO:0008307 structural constituent of muscle	DMD	DMD
GO:0019825 oxygen binding	ALBU_HUMAN	ALB
GO:0005524 ATP binding	ATP5B	ATP5B
	HSPA9B	HSPA9B
	ACTA2	ACTA2
	ACTB	ACTB
	ATP5A1	ATP5A1
	ACTG1	ACTB
GO:0016209 antioxidant activity	ALBU_HUMAN	ALB
GO:0019901 protein kinase binding	ITGB2	ITGB2
GO:0005507 copper ion binding	ALBU_HUMAN	ALB
GO:0000166 nucleotide binding	ATP5B	ATP5B
	HSPA9B	HSPA9B
	ACTA2	ACTA2
	SFRS1	SFRS1
	ACTB	ACTB
	ATP5A1	ATP5A1
	ACTG1	ACTB
GO:0003714 transcription corepressor activity	RMP	C19orf2
GO:0016820 hydrolase activity, acting on acid anhy..	ATP5A1	ATP5A1
GO:0003735 structural constituent of ribosome	RPS27A	RPS27A
GO:0008270 zinc ion binding	dystrophin	DMD
	DMD	DMD
	Q59HC3_HUMAN	DMD
	DMD	DMD
	DMD	DMD
GO:0005215 transporter activity	ATP5B	ATP5B
	SLC22A11	SLC22A11
	ATP5A1	ATP5A1
GO:0017111 nucleoside-triphosphatase activity	ATP5B	ATP5B
GO:0003723 RNA binding	SFRS1	SFRS1
GO:0004872 receptor activity	KRT1	KRT1
	ITGB2	ITGB2
	GPR179	GPR179
GO:0003677 DNA binding	ALBU_HUMAN	ALB
	SYCP2	SYCP2
GO:0016787 hydrolase activity	ATP5B	ATP5B
	ATP5A1	ATP5A1
GO:0046872 metal ion binding	ATP5B	ATP5B
	ALBU_HUMAN	ALB
	ATP5A1	ATP5A1
GO:0005488 binding	ELMO2	ELMO2
	ELMO2	ELMO2
	ELMO2	ELMO2
